# Supplementary material for: Global, regional, and national burden of suicide mortality 1990 to 2016: systematic analysis for the Global Burden of Disease Study 2016
Source: PubMed Central journal article supplement (PMC6598639; doi:10.1136/bmj.l94), 2019-02-06
Supplement: nagm045998.ww1.pdf [file nagm045998.ww1.pdf]

Supplementary Figure 1. Fraction of deaths classified as suicide in 40-44 year old females for the year 2013, from source of death classification

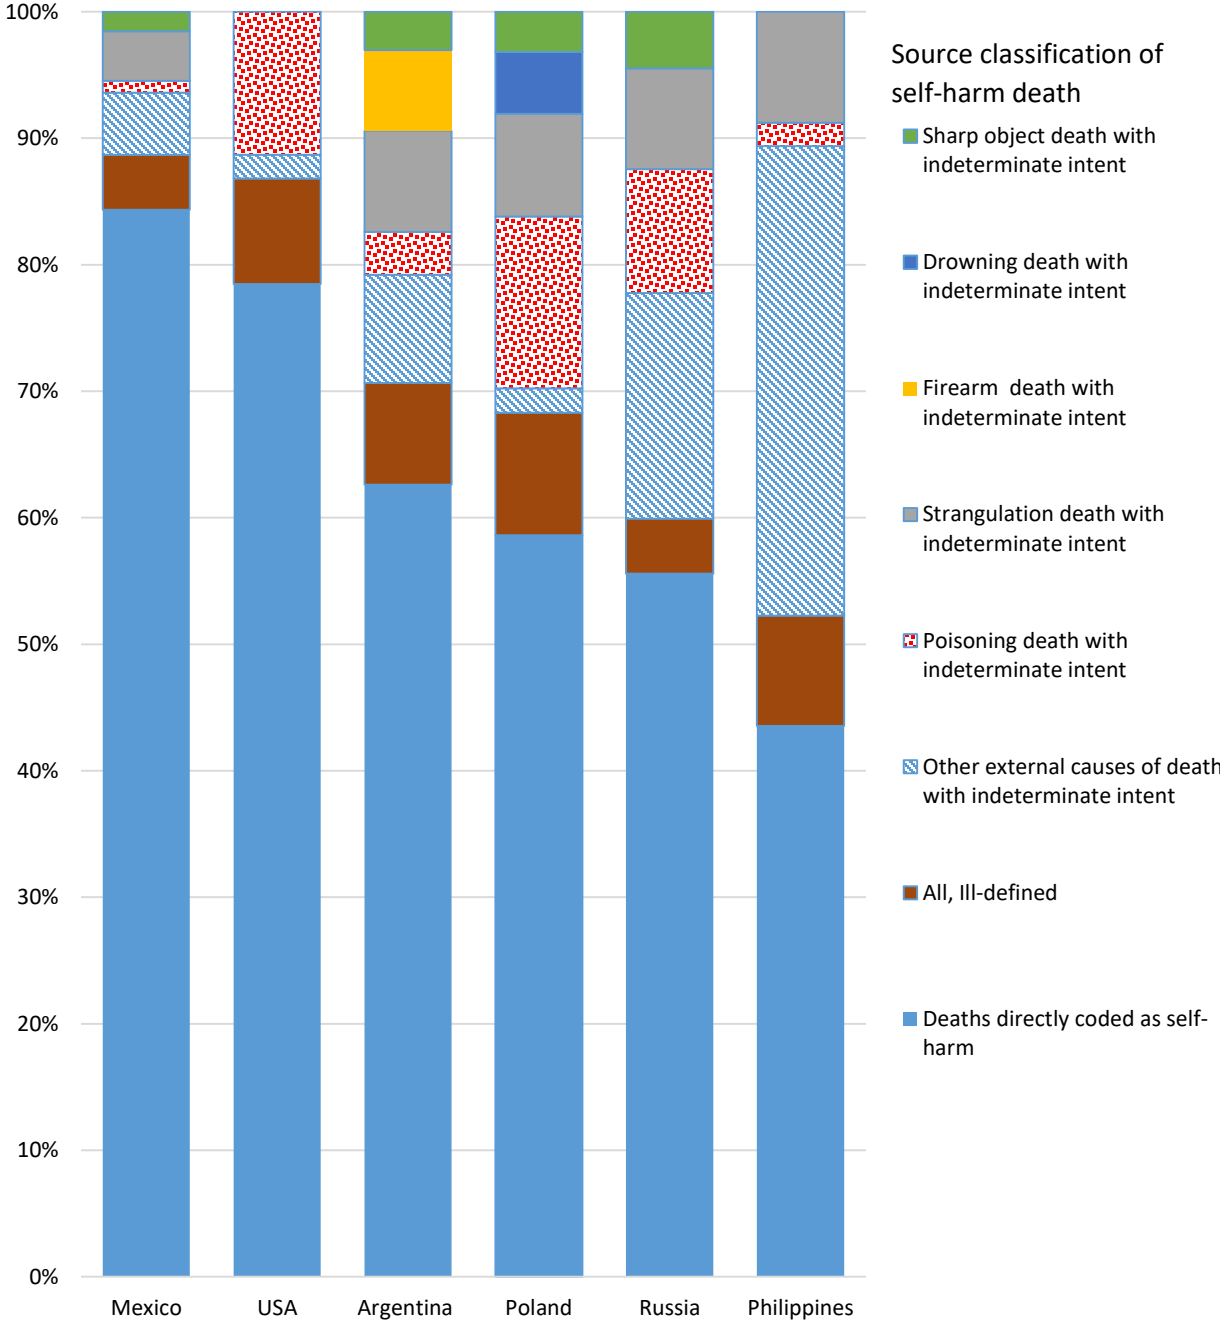

Supplementary Figure 2A: Both sexes, Age-standardized, 2016, Deaths per 100,000

2016

|                              | Andean Latin America | East Asia | Australasia | Caribbean | Central Asia | Central Europe | Central Latin America | Central Sub-Saharan Africa | Eastern Sub-Saharan Africa | Eastern Europe | High-income Asia Pacific | North Africa and Middle East | Southern Latin America | Southeast Asia | Oceania | South Asia | Southern Sub-Saharan Africa | Tropical Latin America | Western Sub-Saharan Africa | Western Europe |    |
|------------------------------|----------------------|-----------|-------------|-----------|--------------|----------------|-----------------------|----------------------------|----------------------------|----------------|--------------------------|------------------------------|------------------------|----------------|---------|------------|-----------------------------|------------------------|----------------------------|----------------|----|
| Ischemic heart disease       | 1                    | 1         | 1           | 1         | 1            | 1              | 1                     | 1                          | 2                          | 1              | 1                        | 2                            | 1                      | 1              | 1       | 1          | 1                           | 2                      | 1                          | 1              | 1  |
| Stroke                       | 2                    | 3         | 3           | 2         | 2            | 2              | 5                     | 3                          | 2                          | 4              | 3                        | 4                            | 2                      | 2              | 4       | 2          | 2                           | 5                      | 2                          | 3              | 3  |
| COPD                         | 3                    | 8         | 5           | 9         | 5            | 7              | 6                     | 10                         | 11                         | 10             | 12                       | 5                            | 7                      | 4              | 2       | 6          | 4                           | 7                      | 5                          | 5              | 10 |
| Alzheimer disease            | 4                    | 5         | 2           | 5         | 6            | 4              | 4                     | 8                          | 3                          | 8              | 1                        | 2                            | 3                      | 9              | 9       | 3          | 5                           | 10                     | 3                          | 2              | 9  |
| Lung cancer                  | 5                    | 11        | 4           | 8         | 8            | 3              | 13                    | 31                         | 6                          | 36             | 4                        | 3                            | 11                     | 14             | 18      | 9          | 6                           | 14                     | 10                         | 4              | 34 |
| Liver cancer                 | 6                    | 16        | 24          | 27        | 15           | 22             | 19                    | 23                         | 34                         | 28             | 9                        | 27                           | 19                     | 30             | 45      | 14         | 33                          | 27                     | 27                         | 20             | 13 |
| Stomach cancer               | 7                    | 7         | 20          | 20        | 10           | 15             | 14                    | 32                         | 12                         | 33             | 7                        | 29                           | 17                     | 19             | 21      | 20         | 11                          | 32                     | 14                         | 15             | 26 |
| Road injuries                | 8                    | 9         | 16          | 12        | 12           | 16             | 9                     | 14                         | 9                          | 15             | 13                       | 11                           | 6                      | 10             | 11      | 10         | 10                          | 9                      | 8                          | 21             | 16 |
| Hypertensive heart disease   | 9                    | 15        | 35          | 11        | 3            | 8              | 10                    | 12                         | 15                         | 12             | 21                       | 16                           | 10                     | 11             | 13      | 11         | 13                          | 11                     | 11                         | 16             | 23 |
| Lower respiratory infections | 10                   | 2         | 9           | 4         | 4            | 9              | 8                     | 4                          | 8                          | 3              | 5                        | 6                            | 8                      | 5              | 5       | 4          | 3                           | 3                      | 4                          | 7              | 2  |
| Esophageal cancer            | 11                   | 60        | 27          | 46        | 23           | 39             | 59                    | 40                         | 47                         | 30             | 20                       | 32                           | 52                     | 76             | 39      | 53         | 32                          | 19                     | 29                         | 28             | 47 |
| Chronic kidney disease       | 12                   | 4         | 10          | 7         | 11           | 17             | 2                     | 22                         | 33                         | 20             | 10                       | 8                            | 5                      | 7              | 8       | 8          | 7                           | 13                     | 9                          | 13             | 19 |
| Colorectal cancer            | 13                   | 14        | 6           | 13        | 17           | 6              | 16                    | 33                         | 7                          | 23             | 8                        | 7                            | 18                     | 27             | 28      | 16         | 9                           | 23                     | 13                         | 6              | 33 |
| Diabetes                     | 14                   | 6         | 8           | 3         | 7            | 11             | 3                     | 11                         | 31                         | 9              | 14                       | 9                            | 4                      | 3              | 6       | 5          | 8                           | 4                      | 6                          | 10             | 8  |
| Falls                        | 15                   | 24        | 15          | 23        | 37           | 19             | 24                    | 19                         | 20                         | 16             | 22                       | 18                           | 25                     | 46             | 10      | 15         | 37                          | 44                     | 18                         | 17             | 17 |
| Self-harm                    | 16                   | 27        | 7           | 18        | 13           | 10             | 21                    | 26                         | 4                          | 21             | 6                        | 10                           | 28                     | 15             | 14      | 24         | 15                          | 15                     | 24                         | 11             | 25 |
| Congenital defects           | 17                   | 17        | 37          | 19        | 25           | 33             | 18                    | 36                         | 32                         | 68             | 36                       | 34                           | 14                     | 21             | 26      | 26         | 23                          | 36                     | 20                         | 36             | 22 |
| Drowning                     | 18                   | 42        | 68          | 37        | 29           | 50             | 40                    | 37                         | 23                         | 42             | 33                       | 63                           | 46                     | 20             | 37      | 33         | 55                          | 45                     | 42                         | 74             | 39 |
| Rheumatic heart disease      | 19                   | 56        | 54          | 43        | 30           | 55             | 77                    | 43                         | 57                         | 57             | 46                       | 45                           | 49                     | 12             | 16      | 42         | 26                          | 43                     | 71                         | 46             | 42 |
| Cirrhosis hepatitis B        | 20                   | 28        | 44          | 67        | 9            | 38             | 76                    | 24                         | 30                         | 27             | 28                       | 73                           | 21                     | 16             | 23      | 18         | 42                          | 47                     | 45                         | 55             | 20 |
| Other cardiovascular         | 21                   | 25        | 17          | 17        | 26           | 12             | 23                    | 13                         | 25                         | 7              | 19                       | 15                           | 12                     | 13             | 71      | 21         | 12                          | 25                     | 15                         | 9              | 12 |
| Other neoplasms              | 22                   | 30        | 18          | 24        | 27           | 21             | 22                    | 39                         | 24                         | 25             | 16                       | 21                           | 29                     | 39             | 22      | 27         | 18                          | 33                     | 23                         | 18             | 37 |
| Neonatal preterm birth       | 23                   | 21        | 52          | 21        | 22           | 43             | 25                    | 27                         | 58                         | 29             | 61                       | 39                           | 15                     | 22             | 15      | 22         | 29                          | 24                     | 28                         | 50             | 21 |
| Pancreatic cancer            | 24                   | 29        | 13          | 30        | 32           | 14             | 31                    | 50                         | 19                         | 52             | 11                       | 13                           | 30                     | 52             | 54      | 38         | 17                          | 34                     | 26                         | 12             | 38 |
| Breast cancer                | 25                   | 23        | 12          | 16        | 18           | 13             | 20                    | 30                         | 14                         | 34             | 17                       | 12                           | 20                     | 17             | 24      | 19         | 14                          | 21                     | 19                         | 8              | 24 |

Supplementary Figure 2B: Both sexes, Age-standardized, 2016, YLLs per 100,000

2016

|                              | Andean Latin America | East Asia | Australasia | Caribbean | Central Asia | Central Europe | Central Latin America | Central Sub-Saharan Africa | Eastern Europe | Eastern Sub-Saharan Africa | High-income Asia Pacific | High-income North America | North Africa and Middle East | Oceania | Southern Latin America | Southeast Asia | Southern Sub-Saharan Africa | Tropical Latin America | Western Europe | Western Sub-Saharan Africa |    |
|------------------------------|----------------------|-----------|-------------|-----------|--------------|----------------|-----------------------|----------------------------|----------------|----------------------------|--------------------------|---------------------------|------------------------------|---------|------------------------|----------------|-----------------------------|------------------------|----------------|----------------------------|----|
| Stroke                       | 1                    | 4         | 4           | 2         | 2            | 2              | 8                     | 7                          | 2              | 6                          | 3                        | 5                         | 2                            | 2       | 3                      | 2              | 2                           | 8                      | 3              | 3                          | 6  |
| Ischemic heart disease       | 2                    | 2         | 1           | 1         | 1            | 1              | 1                     | 6                          | 1              | 5                          | 2                        | 1                         | 1                            | 1       | 1                      | 1              | 4                           | 1                      | 1              | 5                          |    |
| Road injuries                | 3                    | 3         | 6           | 5         | 6            | 6              | 5                     | 9                          | 5              | 13                         | 10                       | 3                         | 3                            | 8       | 9                      | 5              | 4                           | 6                      | 4              | 8                          | 14 |
| COPD                         | 4                    | 15        | 7           | 17        | 11           | 10             | 10                    | 16                         | 17             | 16                         | 17                       | 6                         | 11                           | 5       | 5                      | 9              | 9                           | 12                     | 8              | 7                          | 17 |
| Lung cancer                  | 5                    | 19        | 2           | 13        | 13           | 3              | 17                    | 40                         | 9              | 54                         | 5                        | 2                         | 13                           | 22      | 26                     | 12             | 7                           | 18                     | 12             | 2                          | 45 |
| Liver cancer                 | 6                    | 24        | 25          | 38        | 23           | 27             | 29                    | 30                         | 42             | 32                         | 7                        | 28                        | 27                           | 40      | 57                     | 17             | 34                          | 35                     | 38             | 22                         | 16 |
| Congenital defects           | 7                    | 6         | 10          | 7         | 9            | 9              | 7                     | 14                         | 11             | 35                         | 12                       | 12                        | 5                            | 11      | 14                     | 10             | 5                           | 17                     | 6              | 10                         | 11 |
| Stomach cancer               | 8                    | 9         | 24          | 31        | 15           | 18             | 16                    | 43                         | 14             | 44                         | 6                        | 35                        | 26                           | 32      | 32                     | 30             | 15                          | 40                     | 17             | 17                         | 39 |
| Neonatal preterm birth       | 9                    | 7         | 17          | 9         | 7            | 13             | 9                     | 10                         | 31             | 11                         | 28                       | 14                        | 6                            | 10      | 7                      | 7              | 8                           | 10                     | 10             | 18                         | 9  |
| Alzheimer disease            | 10                   | 13        | 8           | 18        | 21           | 11             | 11                    | 21                         | 21             | 26                         | 4                        | 8                         | 10                           | 23      | 23                     | 11             | 16                          | 25                     | 9              | 5                          | 26 |
| Lower respiratory infections | 11                   | 1         | 19          | 3         | 3            | 7              | 6                     | 3                          | 7              | 3                          | 9                        | 11                        | 7                            | 3       | 4                      | 3              | 3                           | 2                      | 5              | 11                         | 3  |
| Drowning                     | 12                   | 21        | 39          | 24        | 17           | 33             | 27                    | 22                         | 16             | 34                         | 27                       | 42                        | 32                           | 13      | 22                     | 19             | 31                          | 34                     | 25             | 55                         | 31 |
| Self-harm                    | 13                   | 16        | 3           | 16        | 8            | 4              | 13                    | 24                         | 3              | 24                         | 1                        | 4                         | 21                           | 12      | 11                     | 18             | 6                           | 13                     | 14             | 4                          | 25 |
| Neonatal encephalopathy      | 14                   | 11        | 29          | 10        | 5            | 47             | 15                    | 11                         | 35             | 9                          | 53                       | 37                        | 20                           | 18      | 8                      | 13             | 36                          | 11                     | 15             | 37                         | 7  |
| Esophageal cancer            | 15                   | 76        | 30          | 56        | 36           | 41             | 68                    | 51                         | 48             | 42                         | 21                       | 33                        | 56                           | 85      | 50                     | 67             | 37                          | 27                     | 36             | 29                         | 65 |
| Hypertensive heart disease   | 16                   | 33        | 55          | 19        | 4            | 15             | 24                    | 19                         | 25             | 20                         | 36                       | 23                        | 17                           | 16      | 18                     | 16             | 21                          | 15                     | 21             | 33                         | 38 |
| Chronic kidney disease       | 17                   | 5         | 20          | 12        | 14           | 23             | 3                     | 34                         | 38             | 28                         | 13                       | 15                        | 9                            | 7       | 13                     | 8              | 10                          | 14                     | 11             | 23                         | 21 |
| Colon and rectum cancer      | 18                   | 23        | 5           | 23        | 28           | 5              | 26                    | 48                         | 13             | 38                         | 8                        | 9                         | 25                           | 41      | 42                     | 23             | 12                          | 33                     | 19             | 6                          | 43 |
| Falls                        | 19                   | 32        | 28          | 37        | 34           | 22             | 30                    | 35                         | 20             | 25                         | 20                       | 29                        | 24                           | 51      | 15                     | 22             | 41                          | 55                     | 28             | 24                         | 23 |
| Diabetes                     | 20                   | 8         | 12          | 6         | 10           | 14             | 4                     | 15                         | 39             | 14                         | 16                       | 13                        | 8                            | 4       | 12                     | 4              | 11                          | 5                      | 7              | 15                         | 15 |
| Leukemia                     | 21                   | 20        | 14          | 27        | 30           | 25             | 21                    | 63                         | 33             | 69                         | 18                       | 24                        | 23                           | 42      | 51                     | 37             | 24                          | 42                     | 33             | 16                         | 63 |
| Mechanical forces            | 22                   | 38        | 50          | 39        | 49           | 52             | 37                    | 46                         | 37             | 51                         | 44                       | 38                        | 37                           | 37      | 58                     | 65             | 40                          | 38                     | 49             | 63                         | 40 |
| Other neoplasms              | 23                   | 31        | 18          | 26        | 29           | 21             | 22                    | 45                         | 28             | 23                         | 15                       | 22                        | 33                           | 43      | 28                     | 31             | 18                          | 29                     | 26             | 14                         | 44 |
| Cirrhosis hepatitis B        | 24                   | 36        | 40          | 67        | 12           | 34             | 76                    | 27                         | 27             | 31                         | 23                       | 70                        | 31                           | 20      | 29                     | 24             | 44                          | 46                     | 45             | 49                         | 19 |
| Brain cancer                 | 25                   | 41        | 15          | 49        | 35           | 20             | 41                    | 76                         | 34             | 71                         | 31                       | 25                        | 35                           | 80      | 65                     | 48             | 39                          | 58                     | 31             | 19                         | 66 |

Supplementary Figure 3A: Both sexes, 70+ years, Deaths per 100,000

2016

|                                               | Andean Latin America | East Asia | Australasia | Caribbean | Central Asia | Central Europe | Central Latin America | Central Sub-Saharan Africa | Eastern Sub-Saharan Africa | Eastern Europe | High-income Asia Pacific | North Africa and Middle East | Oceania | South Asia | Southeast Asia | Southern Latin America | Southern Sub-Saharan Africa | Tropical Latin America | Western Europe | Western Sub-Saharan Africa |    |
|-----------------------------------------------|----------------------|-----------|-------------|-----------|--------------|----------------|-----------------------|----------------------------|----------------------------|----------------|--------------------------|------------------------------|---------|------------|----------------|------------------------|-----------------------------|------------------------|----------------|----------------------------|----|
| Ischemic heart disease                        | 1                    | 1         | 1           | 1         | 1            | 1              | 1                     | 1                          | 1                          | 1              | 2                        | 1                            | 1       | 1          | 1              | 1                      | 1                           | 1                      | 1              | 1                          | 1  |
| Cerebrovascular disease                       | 2                    | 5         | 3           | 2         | 2            | 2              | 6                     | 2                          | 2                          | 2              | 3                        | 3                            | 2       | 2          | 4              | 2                      | 3                           | 2                      | 3              | 3                          | 3  |
| Chronic obstructive pulmonary disease         | 3                    | 6         | 4           | 7         | 5            | 5              | 5                     | 7                          | 4                          | 8              | 9                        | 4                            | 5       | 3          | 2              | 4                      | 5                           | 5                      | 4              | 4                          | 8  |
| Alzheimer disease and other dementias         | 4                    | 3         | 2           | 3         | 4            | 3              | 2                     | 6                          | 3                          | 7              | 1                        | 2                            | 3       | 9          | 7              | 3                      | 4                           | 6                      | 2              | 2                          | 6  |
| Tracheal, bronchus, and lung cancer           | 5                    | 12        | 5           | 10        | 9            | 8              | 11                    | 23                         | 6                          | 29             | 5                        | 5                            | 11      | 12         | 14             | 9                      | 10                          | 13                     | 10             | 5                          | 23 |
| Hypertensive heart disease                    | 6                    | 11        | 23          | 9         | 3            | 6              | 8                     | 8                          | 7                          | 10             | 14                       | 15                           | 8       | 10         | 12             | 10                     | 8                           | 7                      | 8              | 12                         | 15 |
| Stomach cancer                                | 7                    | 8         | 18          | 14        | 8            | 14             | 10                    | 21                         | 8                          | 25             | 6                        | 26                           | 13      | 14         | 17             | 20                     | 13                          | 24                     | 14             | 17                         | 19 |
| Liver cancer                                  | 8                    | 14        | 30          | 17        | 13           | 22             | 15                    | 19                         | 24                         | 26             | 10                       | 27                           | 20      | 24         | 37             | 16                     | 28                          | 22                     | 23             | 23                         | 13 |
| Lower respiratory infections                  | 9                    | 2         | 7           | 5         | 10           | 9              | 7                     | 4                          | 13                         | 4              | 4                        | 6                            | 7       | 6          | 5              | 5                      | 2                           | 4                      | 5              | 6                          | 2  |
| Chronic kidney disease                        | 10                   | 4         | 8           | 8         | 7            | 13             | 4                     | 18                         | 21                         | 14             | 8                        | 7                            | 6       | 7          | 10             | 8                      | 6                           | 10                     | 7              | 9                          | 14 |
| Esophageal cancer                             | 11                   | 44        | 27          | 36        | 17           | 42             | 47                    | 27                         | 35                         | 22             | 26                       | 31                           | 44      | 53         | 32             | 44                     | 25                          | 16                     | 26             | 30                         | 39 |
| Diabetes mellitus                             | 12                   | 7         | 10          | 4         | 6            | 10             | 3                     | 9                          | 18                         | 9              | 13                       | 9                            | 4       | 4          | 6              | 6                      | 7                           | 3                      | 6              | 10                         | 7  |
| Colon and rectum cancer                       | 13                   | 13        | 6           | 11        | 12           | 7              | 13                    | 22                         | 5                          | 19             | 7                        | 8                            | 14      | 19         | 18             | 14                     | 9                           | 18                     | 13             | 7                          | 24 |
| Falls                                         | 14                   | 21        | 11          | 13        | 35           | 16             | 19                    | 17                         | 26                         | 11             | 23                       | 12                           | 23      | 35         | 9              | 13                     | 26                          | 32                     | 16             | 14                         | 12 |
| Other cardiovascular and circulatory diseases | 15                   | 20        | 12          | 12        | 18           | 11             | 17                    | 11                         | 17                         | 6              | 16                       | 10                           | 9       | 11         | 42             | 17                     | 11                          | 17                     | 12             | 8                          | 11 |
| Rheumatic heart disease                       | 16                   | 40        | 44          | 38        | 27           | 44             | 67                    | 35                         | 52                         | 50             | 37                       | 35                           | 46      | 13         | 13             | 41                     | 20                          | 41                     | 65             | 34                         | 33 |
| Atrial fibrillation and flutter               | 17                   | 19        | 13          | 16        | 15           | 19             | 20                    | 34                         | 11                         | 32             | 17                       | 17                           | 22      | 34         | 20             | 23                     | 18                          | 26                     | 20             | 13                         | 35 |
| Road injuries                                 | 18                   | 17        | 48          | 27        | 32           | 38             | 24                    | 32                         | 34                         | 16             | 31                       | 39                           | 15      | 27         | 16             | 19                     | 33                          | 20                     | 24             | 48                         | 17 |
| Parkinson disease                             | 19                   | 26        | 16          | 22        | 16           | 18             | 27                    | 51                         | 12                         | 47             | 21                       | 14                           | 21      | 40         | 29             | 26                     | 17                          | 37                     | 28             | 19                         | 41 |
| Self-harm                                     | 20                   | 59        | 49          | 33        | 34           | 29             | 58                    | 28                         | 20                         | 24             | 22                       | 43                           | 57      | 45         | 33             | 46                     | 43                          | 30                     | 58             | 42                         | 26 |

Supplementary Figure 3B: Both sexes, 10 to 24, Deaths per 100,000

2016

|                                 | Andean Latin America | East Asia | Australasia | Caribbean | Central Asia | Central Europe | Central Latin America | Central Sub-Saharan Africa | Eastern Sub-Saharan Africa | Eastern Europe | High-income Asia Pacific | High-income North America | North Africa and Middle East | Oceania | Southern Latin America | Southeast Asia | Southern Sub-Saharan Africa | Tropical Latin America | Western Sub-Saharan Africa | Western Europe |    |
|---------------------------------|----------------------|-----------|-------------|-----------|--------------|----------------|-----------------------|----------------------------|----------------------------|----------------|--------------------------|---------------------------|------------------------------|---------|------------------------|----------------|-----------------------------|------------------------|----------------------------|----------------|----|
| Road injuries                   | 1                    | 1         | 2           | 1         | 2            | 1              | 2                     | 1                          | 2                          | 4              | 2                        | 1                         | 2                            | 1       | 2                      | 1              | 1                           | 3                      | 2                          | 1              | 6  |
| Drowning                        | 2                    | 6         | 10          | 5         | 4            | 3              | 4                     | 8                          | 4                          | 9              | 5                        | 5                         | 5                            | 3       | 6                      | 3              | 4                           | 10                     | 4                          | 10             | 10 |
| Self-harm                       | 3                    | 3         | 1           | 4         | 1            | 2              | 3                     | 12                         | 1                          | 10             | 1                        | 2                         | 3                            | 2       | 1                      | 4              | 2                           | 6                      | 3                          | 2              | 12 |
| Leukemia                        | 4                    | 5         | 5           | 11        | 10           | 5              | 5                     | 29                         | 13                         | 36             | 3                        | 8                         | 9                            | 19      | 27                     | 16             | 5                           | 18                     | 6                          | 4              | 34 |
| Falls                           | 5                    | 19        | 14          | 33        | 12           | 11             | 15                    | 27                         | 6                          | 18             | 7                        | 18                        | 15                           | 38      | 16                     | 15             | 16                          | 45                     | 15                         | 13             | 24 |
| Congenital birth defects        | 6                    | 14        | 7           | 8         | 15           | 9              | 9                     | 24                         | 10                         | 47             | 6                        | 6                         | 7                            | 17      | 23                     | 10             | 9                           | 13                     | 10                         | 6              | 11 |
| Ischemic heart disease          | 7                    | 10        | 27          | 21        | 9            | 16             | 11                    | 39                         | 15                         | 24             | 13                       | 15                        | 8                            | 15      | 8                      | 11             | 14                          | 42                     | 11                         | 22             | 32 |
| Cerebrovascular disease         | 8                    | 8         | 20          | 9         | 19           | 13             | 12                    | 21                         | 21                         | 17             | 14                       | 17                        | 10                           | 6       | 32                     | 12             | 10                          | 12                     | 9                          | 17             | 18 |
| Exposure to mechanical forces   | 9                    | 11        | 15          | 10        | 22           | 15             | 8                     | 17                         | 12                         | 25             | 18                       | 11                        | 11                           | 14      | 31                     | 28             | 7                           | 11                     | 13                         | 15             | 20 |
| Interpersonal violence          | 10                   | 2         | 4           | 2         | 5            | 6              | 1                     | 9                          | 3                          | 7              | 9                        | 3                         | 4                            | 8       | 7                      | 6              | 3                           | 2                      | 1                          | 8              | 16 |
| Other unintentional injuries    | 11                   | 27        | 30          | 20        | 17           | 18             | 20                    | 38                         | 16                         | 34             | 35                       | 36                        | 18                           | 37      | 25                     | 20             | 12                          | 47                     | 14                         | 32             | 37 |
| Brain and nervous system cancer | 12                   | 17        | 9           | 31        | 16           | 8              | 18                    | 53                         | 18                         | 49             | 8                        | 12                        | 19                           | 62      | 37                     | 27             | 15                          | 35                     | 12                         | 7              | 47 |
| Other neoplasms                 | 13                   | 15        | 6           | 14        | 13           | 7              | 10                    | 22                         | 14                         | 11             | 4                        | 7                         | 14                           | 23      | 19                     | 17             | 8                           | 14                     | 7                          | 5              | 30 |
| Drug use disorders              | 14                   | 23        | 3           | 45        | 24           | 12             | 25                    | 54                         | 5                          | 87             | 25                       | 4                         | 25                           | 61      | 45                     | 39             | 25                          | 25                     | 20                         | 3              | 50 |
| Epilepsy                        | 15                   | 18        | 11          | 17        | 6            | 14             | 14                    | 16                         | 26                         | 12             | 12                       | 25                        | 17                           | 30      | 12                     | 22             | 19                          | 9                      | 21                         | 11             | 19 |
| Chronic kidney disease          | 16                   | 13        | 33          | 13        | 7            | 22             | 6                     | 30                         | 30                         | 23             | 24                       | 30                        | 13                           | 16      | 15                     | 8              | 17                          | 19                     | 17                         | 33             | 17 |
| Lower respiratory infections    | 17                   | 4         | 21          | 7         | 3            | 4              | 7                     | 6                          | 7                          | 5              | 10                       | 14                        | 6                            | 4       | 9                      | 7              | 6                           | 5                      | 5                          | 18             | 7  |
| Poisonings                      | 18                   | 31        | 24          | 46        | 30           | 34             | 32                    | 50                         | 23                         | 57             | 23                       | 20                        | 31                           | 26      | 48                     | 54             | 31                          | 33                     | 58                         | 31             | 56 |
| Liver cancer                    | 19                   | 40        | 37          | 63        | 44           | 42             | 59                    | 61                         | 48                         | 54             | 30                       | 46                        | 55                           | 67      | 91                     | 62             | 71                          | 51                     | 63                         | 40             | 27 |
| Other transport injuries        | 20                   | 20        | 12          | 36        | 33           | 10             | 17                    | 41                         | 9                          | 44             | 17                       | 10                        | 28                           | 22      | 21                     | 23             | 13                          | 28                     | 16                         | 14             | 55 |

Supplementary Figure 4

Global Rates of Self-harm for ages 15-19, 1990-2016

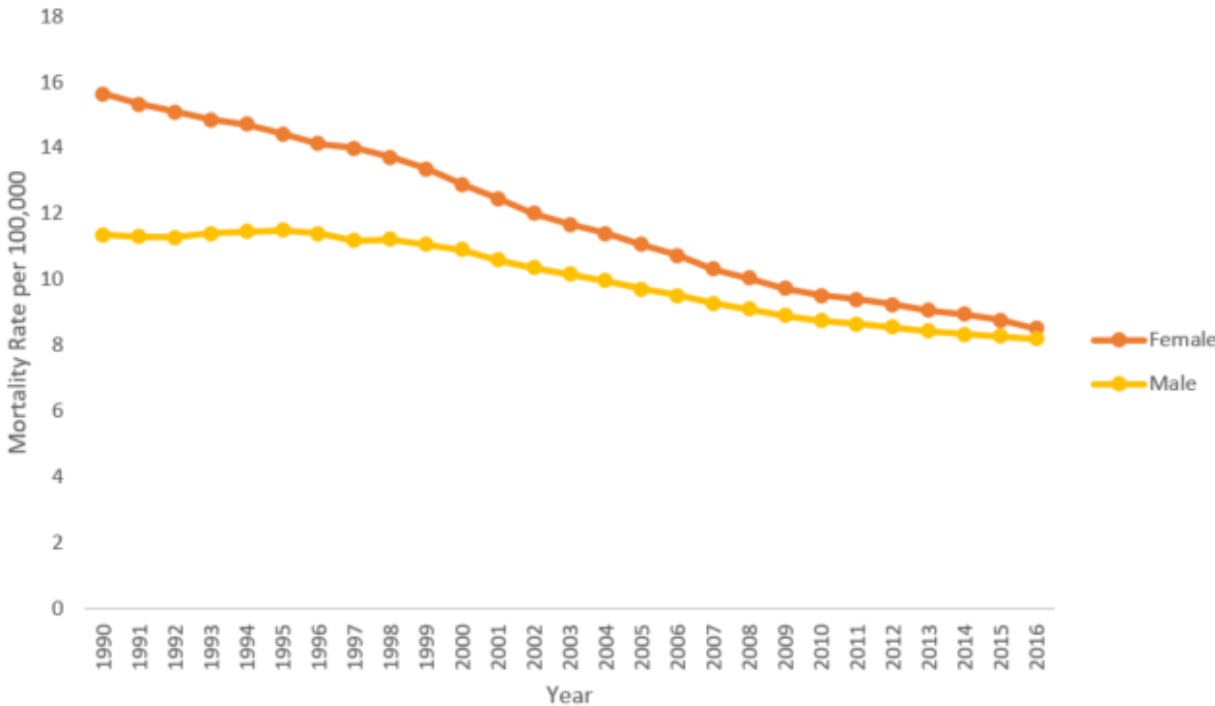

Supplementary Figure 5. Percent of all self-harm deaths that occurred in age groups 15 to 29 years, 30 to 59 years, and 60 years and above – globally and in each GBD super-region for both sexes combined in 2016.

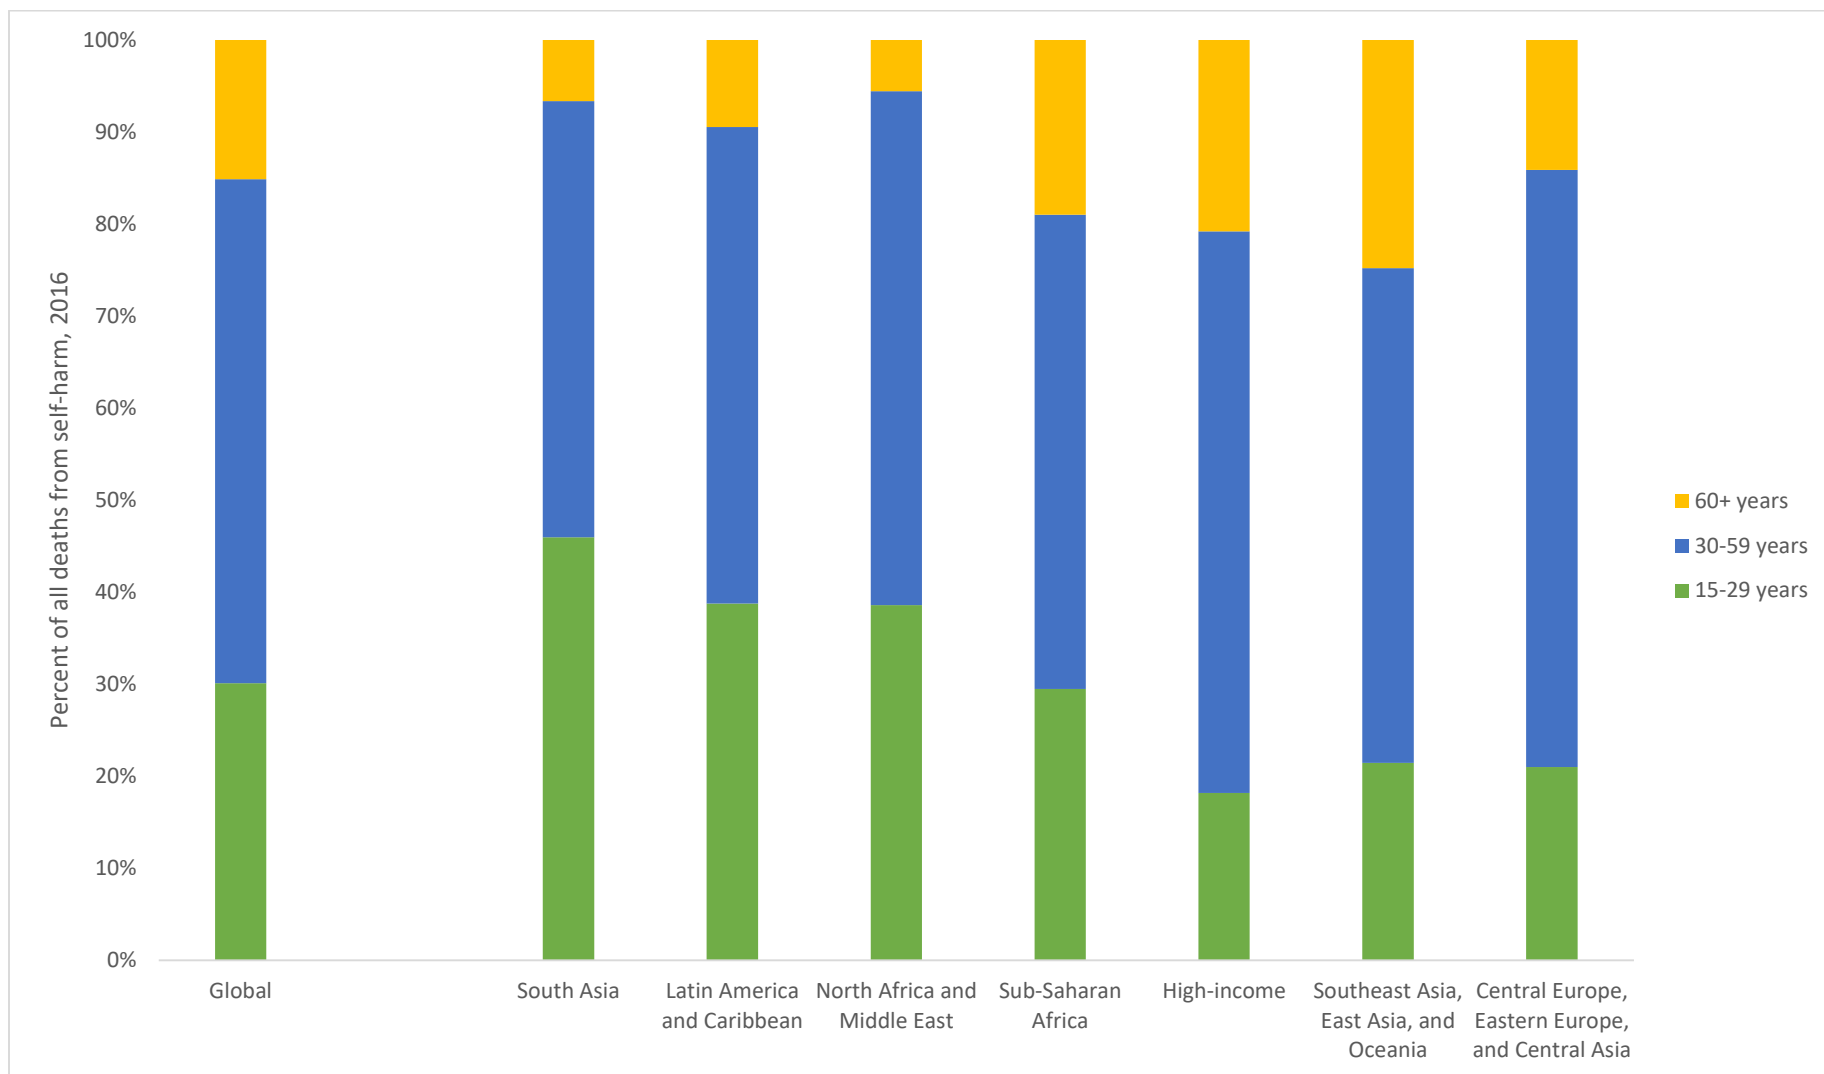

SR Table 1. Total number of deaths, age-standardized rates of death in males, age-standardized rates of death in females, age-standardized rates of death for both sexes, female/male age-standardized death rates ratio, and the percent change in the rate of death for all reporting locations in 2016

| Location Name                                  | Cause of Death Star Rating | Deaths                      |                        |                        |                        |                           |                             |                              | YLLs                      |                           |                           |                           |                       |  |  |
|------------------------------------------------|----------------------------|-----------------------------|------------------------|------------------------|------------------------|---------------------------|-----------------------------|------------------------------|---------------------------|---------------------------|---------------------------|---------------------------|-----------------------|--|--|
|                                                |                            | Number                      | Male ASR               | Female ASR             | Both sexes ASR         | Percent change 1990-2016  | Female:Male ASR Ratio       | Number                       | Male ASR                  | Female ASR                | Both sexes ASR            | Percent change 1990-2016  | Female:Male ASR Ratio |  |  |
| Southeast Asia, East Asia, and Oceania         |                            | 120500<br>(17000 to 200000) | 11.1<br>(5.4 to 21.9)  | 5.3<br>(2.9 to 8.7)    | 8.2<br>(5.0 to 9.3)    | -0.6<br>(-4.6 to -0.1)    | 0.5                         | 601000<br>(600000 to 700000) | 32.5<br>(30.6 to 40.7)    | 19.2<br>(18.7 to 21.4)    | 20.0<br>(27.7 to 35.2)    | -0.7<br>(-6.9 to -6.1)    | 0.5                   |  |  |
| East Asia                                      |                            | 43100<br>(15000 to 15000)   | 6.6<br>(3.4 to 12.8)   | 4.5<br>(2.1 to 7.1)    | 4.7<br>(2.8 to 9.7)    | -4.1<br>(-6.7 to -5.8)    | 0.6                         | 442000<br>(420000 to 530000) | 30.0<br>(23.4 to 49.8)    | 21.6<br>(20.8 to 24.1)    | 20.1<br>(27.4 to 38.3)    | -2.1<br>(-6.8 to -2.3)    | 0.6                   |  |  |
| China                                          | ★★★★☆                      | 122000<br>(12000 to 140000) | 8.0<br>(6.5 to 12.0)   | 6.5<br>(4.9 to 9.5)    | 8.0<br>(6.5 to 9.5)    | 0.0                       | 640000<br>(41000 to 500000) | 29.4<br>(31.5 to 41.9)       | 21.9<br>(20.2 to 27.3)    | 21.3<br>(20.9 to 27.3)    | 0.4<br>(-7.2 to -6.4)     | 0.6                       |                       |  |  |
| North Korea                                    | ☆☆☆☆                       | 400<br>(240 to 600)         | 10.8<br>(11.0 to 24.2) | 8.9<br>(5.2 to 16.3)   | 12.2<br>(28.9 to 27.9) | -12.5<br>(-29.0 to -22.9) | 0.5                         | 12000<br>(9700 to 17000)     | 629.5<br>(454.6 to 900.1) | 388.4<br>(292.7 to 500.1) | 491.6<br>(361.5 to 618.5) | -31.3<br>(-31.3 to -4.9)  | 0.6                   |  |  |
| Taiwan                                         | ★★★★☆                      | 14250<br>(14250 to 500)     | 51.1<br>(14.5 to 31.1) | 35.5<br>(17.5 to 50.5) | 42.9<br>(29.1 to 54.5) | 1.6<br>(-2.1 to 5.4)      | 0.5                         | 6700<br>(4822 to 17000)      | 428.5<br>(42.2 to 403.9)  | 281.9<br>(219.8 to 402.3) | 345.2<br>(281.9 to 402.3) | -1.5<br>(-7.5 to -4.5)    | 0.5                   |  |  |
| Southeast Asia                                 |                            | 42800<br>(1800 to 4000)     | 12.5<br>(9.1 to 25.5)  | 5.8<br>(3.3 to 4.4)    | 6.8<br>(6.3 to 8.9)    | -1.4<br>(-4.6 to -17.3)   | 0.3                         | 180000<br>(100000 to 220000) | 42.1<br>(38.5 to 58.8)    | 18.9<br>(12.1 to 32.1)    | 27.1<br>(28.0 to 29.2)    | -3.7<br>(-4.1 to -36.5)   | 0.3                   |  |  |
| Cambodia                                       | ☆☆☆☆                       | 82<br>(75 to 100)           | 0.1<br>(0.1 to 12.9)   | 0.1<br>(0.1 to 0.9)    | 0.1<br>(0.1 to 1.3)    | 3.9<br>(-2.9 to 12.5)     | 0.3                         | 3000<br>(3000 to 1300)       | 0.1<br>(35.1 to 54.9)     | 0.1<br>(94.4 to 144.4)    | 0.1<br>(22.6 to 128.4)    | -2.4<br>(-31.9 to -12.6)  | 0.3                   |  |  |
| Indonesia                                      | ☆☆☆☆                       | 650<br>(700 to 1000)        | 1.7<br>(4.7 to 6.7)    | 0.8<br>(1.7 to 2)      | 1.3<br>(3.2 to 4.2)    | -2.3<br>(-2.5 to 3.7)     | 0.3                         | 2700<br>(3000 to 4000)       | 0.2<br>(284.8 to 294.7)   | 0.2<br>(62.9 to 75.5)     | 0.2<br>(13.1 to 10.1)     | -0.5<br>(-2.6 to -1.6)    | 0.3                   |  |  |
| Laos                                           | ☆☆☆☆                       | 105<br>(439 to 51)          | 0.4<br>(0.5 to 21.8)   | 0.4<br>(0.3 to 0.9)    | 0.4<br>(7.3 to 13.3)   | -0.9<br>(-1.4 to -1.5)    | 0.3                         | 300<br>(2200 to 4400)        | 0.1<br>(40.3 to 100.9)    | 0.1<br>(14.3 to 39.7)     | 0.1<br>(32.1 to 42.5)     | -1.1<br>(-5.3 to -5.5)    | 0.3                   |  |  |
| Malaysia                                       | ☆☆☆☆                       | 230<br>(195 to 200)         | 0.5<br>(1.5 to 1.6)    | 0.4<br>(1.5 to 1.8)    | 0.4<br>(0.7 to 1.2)    | -0.9<br>(-0.7 to 1.3)     | 0.3                         | 920<br>(750 to 2400)         | 0.1<br>(37.3 to 63.9)     | 0.2<br>(10.2 to 15.5)     | 0.1<br>(28.5 to 38.2)     | -0.1<br>(-3.5 to -2.2)    | 0.3                   |  |  |
| Madagascar                                     | ☆☆☆☆                       | 11<br>(8.4 to 6.2)          | 0.1<br>(4.6 to 7.5)    | 0.1<br>(0.1 to 0.3)    | 0.1<br>(2.7 to 5.2)    | -0.1<br>(-0.6 to 1.1)     | 0.4                         | 33<br>(34 to 33)             | 0.1<br>(34.8 to 35.3)     | 0.1<br>(14.7 to 2.9)      | 0.1<br>(31.4 to 19.4)     | 0.1<br>(9.7 to 8.1)       | 0.4                   |  |  |
| Mauritius                                      | ☆☆☆☆                       | 115<br>(91.1 to 143)        | 13.6<br>(10.2 to 17.3) | 3.4<br>(2.2 to 4.2)    | 8.3<br>(4.8 to 16.5)   | -3.8<br>(-4.4 to -16.5)   | 0.3                         | 536<br>(440 to 600)          | 37.8<br>(44.6 to 79.9)    | 11.2<br>(36.1 to 20.2)    | 36.1<br>(30.4 to 48.4)    | -6.4<br>(-4.8 to -25.9)   | 0.3                   |  |  |
| Myanmar                                        | ☆☆☆☆                       | 100<br>(2400 to 370)        | 0.1<br>(5.4 to 8.5)    | 0.1<br>(4.7 to 7.3)    | 0.1<br>(4.9 to 7.3)    | -0.1<br>(-4.8 to -6.9)    | 0.8                         | 1800<br>(11200 to 1200)      | 0.1<br>(27.9 to 37.2)     | 0.1<br>(157.7 to 232.5)   | 0.1<br>(20.4 to 30.7)     | -0.1<br>(-5.2 to -36.6)   | 0.7                   |  |  |
| Philippines                                    | ☆☆☆☆                       | 4220<br>(4220 to 900)       | 10.2<br>(7.0 to 17.7)  | 5.8<br>(2.3 to 3.5)    | 8.1<br>(4.9 to 10)     | -2.1<br>(-6.8 to -10.4)   | 0.2                         | 20900<br>(2100 to 41000)     | 42.8<br>(26.8 to 78.6)    | 22.8<br>(8.7 to 135.1)    | 34.9<br>(19.8 to 43.7)    | -6.0<br>(-7.3 to -57.3)   | 0.3                   |  |  |
| Si Lanka                                       | ☆☆☆☆                       | 16<br>(1370 to 610)         | 0.2<br>(28.9 to 57.1)  | 0.1<br>(0.6 to 1.2)    | 0.2<br>(0.1 to 11.9)   | -0.2<br>(-0.6 to -2.0)    | 0.2                         | 40<br>(1000 to 2400)         | 0.2<br>(1.0 to 2.8)       | 0.2<br>(28.2 to 54.2)     | 0.2<br>(7.9 to 19.2)      | -0.1<br>(-9.7 to -46.1)   | 0.3                   |  |  |
| Sri Lanka                                      | ☆☆☆☆                       | 16<br>(1370 to 610)         | 0.2<br>(28.9 to 57.1)  | 0.1<br>(0.6 to 1.2)    | 0.2<br>(0.1 to 11.9)   | -0.2<br>(-0.6 to -2.0)    | 0.2                         | 40<br>(1000 to 2400)         | 0.2<br>(1.0 to 2.8)       | 0.2<br>(28.2 to 54.2)     | 0.2<br>(7.9 to 19.2)      | -0.1<br>(-9.7 to -46.1)   | 0.3                   |  |  |
| Sri Lanka                                      | ☆☆☆☆                       | 16<br>(1370 to 610)         | 0.2<br>(28.9 to 57.1)  | 0.1<br>(0.6 to 1.2)    | 0.2<br>(0.1 to 11.9)   | -0.2<br>(-0.6 to -2.0)    | 0.2                         | 40<br>(1000 to 2400)         | 0.2<br>(1.0 to 2.8)       | 0.2<br>(28.2 to 54.2)     | 0.2<br>(7.9 to 19.2)      | -0.1<br>(-9.7 to -46.1)   | 0.3                   |  |  |
| Thailand                                       | ☆☆☆☆                       | 4990<br>(4990 to 950)       | 14.5<br>(11.7 to 30.7) | 7.4<br>(7.1 to 10.7)   | 11.7<br>(6.9 to 10.9)  | -2.7<br>(-2.6 to -2.6)    | 0.2                         | 21600<br>(490 to 4100)       | 77.2<br>(44.4 to 113.3)   | 39.7<br>(27.4 to 40.8)    | 57.4<br>(25.4 to 43.8)    | -1.9<br>(-6.7 to -37.6)   | 0.6                   |  |  |
| Timor-Leste                                    | ☆☆☆☆                       | 63<br>(16.0 to 2.2)         | 0.8<br>(1.4 to 11.4)   | 0.4<br>(1.1 to 2.4)    | 0.6<br>(0.3 to 4.0)    | -3.2<br>(-4.4 to -16.5)   | 0.4                         | 310<br>(1700 to 170)         | 0.2<br>(31.8 to 17.7)     | 0.1<br>(44.4 to 25.8)     | 0.1<br>(15.7 to 40.0)     | -0.9<br>(-3.0 to -40.8)   | 0.4                   |  |  |
| Tuvalu                                         | ☆☆☆☆                       | 440<br>(400 to 2900)        | 31.1<br>(3.1 to 14.1)  | 20.5<br>(14.5 to 28.5) | 6.8<br>(0.1 to 17.4)   | -6.6<br>(-2.7 to 8.2)     | 0.2                         | 7000<br>(2700 to 9000)       | 84.2<br>(33.5 to 57.6)    | 34.2<br>(14.4 to 46.6)    | 48.4<br>(26.3 to 38.2)    | -1.4<br>(-4.6 to -3.1)    | 0.4                   |  |  |
| Vanuatu                                        | ☆☆☆☆                       | 114<br>(101 to 110)         | 0.4<br>(1.4 to 28.5)   | 0.4<br>(1.4 to 28.5)   | 0.4<br>(0.1 to 17.4)   | -1.7<br>(-2.7 to 8.2)     | 0.2                         | 800<br>(5300 to 9000)        | 0.2<br>(31.8 to 17.7)     | 0.2<br>(44.4 to 25.8)     | 0.2<br>(15.7 to 40.0)     | -0.9<br>(-3.0 to -40.8)   | 0.4                   |  |  |
| American Samoa                                 | ☆☆☆☆                       | 33<br>(3.1 to 5.8)          | 2.7<br>(0.6 to 13.1)   | 1.8<br>(0.8 to 4.8)    | 2.1<br>(1.2 to 4.5)    | -1.3<br>(-3.2 to 1.6)     | 0.4                         | 190<br>(170 to 24)           | 1.1<br>(3.8 to 6.1)       | 0.5<br>(1.7 to 26.3)      | 1.2<br>(2.5 to 19.4)      | -0.6<br>(-4.3 to -12.7)   | 0.3                   |  |  |
| Federated States of Micronesia                 | ☆☆☆☆                       | 103<br>(13.1 to 28.8)       | 7.8<br>(19.0 to 48.8)  | 3.5<br>(1.9 to 6.8)    | 5.6<br>(2.9 to 26.2)   | -1.4<br>(-2.6 to 2.9)     | 0.3                         | 300<br>(7.6 to 130)          | 1.1<br>(884.8 to 193.2)   | 0.2<br>(236.6 to 65.9)    | 1.1<br>(684.3 to 191)     | -0.1<br>(-3.9 to 3.5)     | 0.3                   |  |  |
| Fiji                                           | ☆☆☆☆                       | 108<br>(26.4 to 145)        | 17.9<br>(11.4 to 45.7) | 12.9<br>(7.8 to 10.4)  | 15.4<br>(4.3 to 41.4)  | -0.8<br>(-2.4 to 0.8)     | 0.4                         | 540<br>(380 to 170)          | 5.0<br>(52.8 to 124.4)    | 32.4<br>(21.6 to 48.1)    | 59.3<br>(42.6 to 79.7)    | 0.4<br>(-2.7 to -2.5)     | 0.4                   |  |  |
| Guyana                                         | ☆☆☆☆                       | 32<br>(26.4 to 28.5)        | 0.2<br>(24.2 to 29.9)  | 0.2<br>(15.0 to 23.4)  | 0.2<br>(22.7 to 22.2)  | -1.5<br>(-2.7 to 0.2)     | 0.2                         | 150<br>(112.0 to 185.7)      | 0.1<br>(217.6 to 103.8)   | 0.1<br>(34.9 to 101)      | 0.1<br>(78.0 to 102.1)    | -0.2<br>(-2.9 to 2.1)     | 0.2                   |  |  |
| Kiribati                                       | ☆☆☆☆                       | 26<br>(20.5 to 34.1)        | 0.1<br>(31.3 to 38.1)  | 0.1<br>(0.9 to 12)     | 0.1<br>(0.3 to 32.1)   | -0.2<br>(-2.6 to 37.8)    | 0.2                         | 1460<br>(158.0 to 260.8)     | 2.1<br>(158.0 to 260.8)   | 2.1<br>(266.4 to 47.5)    | 2.1<br>(94.9 to 171.2)    | -0.7<br>(-2.7 to 2.8)     | 0.2                   |  |  |
| Marshall Islands                               | ☆☆☆☆                       | 13<br>(8.0 to 14.5)         | 1.1<br>(17.6 to 33.2)  | 1.2<br>(4.4 to 11.1)   | 1.2<br>(1.2 to 21)     | -0.5<br>(-3.5 to 14.1)    | 0.3                         | 40<br>(430 to 78)            | 0.1<br>(48.6 to 178.5)    | 0.1<br>(20.2 to 53.8)     | 0.1<br>(58.0 to 108.3)    | -0.3<br>(-38.8 to -13.4)  | 0.3                   |  |  |
| Northern Mariana Islands                       | ☆☆☆☆                       | 11<br>(8.6 to 17.1)         | 1.1<br>(1.2 to 25.8)   | 1.2<br>(0.2 to 14.5)   | 1.2<br>(1.2 to 21)     | -0.5<br>(-3.5 to 14.1)    | 0.3                         | 40<br>(430 to 78)            | 0.1<br>(48.6 to 178.5)    | 0.1<br>(20.2 to 53.8)     | 0.1<br>(58.0 to 108.3)    | -0.3<br>(-38.8 to -13.4)  | 0.3                   |  |  |
| Papua New Guinea                               | ☆☆☆☆                       | 11<br>(8.6 to 17.1)         | 1.1<br>(1.2 to 25.8)   | 1.2<br>(0.2 to 14.5)   | 1.2<br>(1.2 to 21)     | -0.5<br>(-3.5 to 14.1)    | 0.3                         | 40<br>(430 to 78)            | 0.1<br>(48.6 to 178.5)    | 0.1<br>(20.2 to 53.8)     | 0.1<br>(58.0 to 108.3)    | -0.3<br>(-38.8 to -13.4)  | 0.3                   |  |  |
| Samoa                                          | ☆☆☆☆                       | 21<br>(16.4 to 26.7)        | 0.7<br>(1.4 to 25.3)   | 0.7<br>(0.8 to 15.9)   | 0.7<br>(0.8 to 15.9)   | -2.6<br>(-4.8 to 0.5)     | 0.3                         | 110<br>(370 to 390)          | 0.2<br>(67.8 to 118.5)    | 0.2<br>(112.1 to 134.3)   | 0.2<br>(45.4 to 29.6)     | -0.1<br>(-1.7 to 1.5)     | 0.4                   |  |  |
| Solomon Islands                                | ☆☆☆☆                       | 9<br>(4.0 to 21)            | 0.5<br>(1.7 to 56.5)   | 0.5<br>(1.1 to 23.4)   | 0.5<br>(1.1 to 23.4)   | -2.4<br>(-3.2 to 15.2)    | 0.4                         | 40<br>(12.0 to 67.8)         | 0.2<br>(81.1 to 177.6)    | 0.2<br>(248.9 to 31.1)    | 0.2<br>(31.5 to 67.7)     | -0.1<br>(-1.5 to -7.5)    | 0.4                   |  |  |
| Tonga                                          | ☆☆☆☆                       | 74<br>(5.7 to 13.4)         | 1.5<br>(7.4 to 11.4)   | 0.8<br>(3.0 to 6.6)    | 1.1<br>(1.0 to 9.5)    | -2.6<br>(-2.6 to 3.1)     | 0.5                         | 201<br>(280 to 476)          | 0.1<br>(372.1 to 440.2)   | 0.1<br>(148.9 to 208.7)   | 0.1<br>(274.9 to 448.1)   | -0.4<br>(-22.9 to 4.4)    | 0.3                   |  |  |
| Vanuatu                                        | ☆☆☆☆                       | 287<br>(28.7 to 53.7)       | 3.7<br>(17.6 to 34.7)  | 3.8<br>(5.3 to 13.8)   | 3.8<br>(3.2 to 21.8)   | -0.8<br>(-3.0 to 20.8)    | 0.3                         | 220<br>(152 to 288)          | 0.1<br>(84.3 to 196.7)    | 0.1<br>(23.6 to 82.6)     | 0.1<br>(64.8 to 105.2)    | -0.7<br>(-3.5 to -7.2)    | 0.3                   |  |  |
| Central Asia, Eastern Europe, and Central Asia |                            | 70100<br>(70100 to 12000)   | 28.4<br>(18.0 to 44.8) | 15.8<br>(10.4 to 26.5) | 22.1<br>(16.4 to 33.9) | -1.9<br>(-2.9 to 1.0)     | 0.2                         | 318000<br>(318000 to 800000) | 15.8<br>(11.7 to 30.2)    | 21.1<br>(21.1 to 36.1)    | 21.1<br>(69.9 to 116.3)   | -2.9<br>(-21.8 to -2.9)   | 0.2                   |  |  |
| Central Asia                                   |                            | 42000<br>(8700 to 1200)     | 28.4<br>(18.0 to 44.8) | 15.8<br>(10.4 to 26.5) | 22.1<br>(16.4 to 33.9) | -1.9<br>(-2.9 to 1.0)     | 0.2                         | 318000<br>(318000 to 800000) | 15.8<br>(11.7 to 30.2)    | 21.1<br>(21.1 to 36.1)    | 21.1<br>(69.9 to 116.3)   | -2.9<br>(-21.8 to -2.9)   | 0.2                   |  |  |
| Azerbaijan                                     | ☆☆☆☆                       | 222<br>(161 to 308)         | 13.1<br>(16.1 to 30.8) | 7.3<br>(4.7 to 9.9)    | 11.2<br>(11.2 to 29.8) | -2.9<br>(-2.9 to 3.3)     | 0.2                         | 900<br>(1330 to 2000)        | 1.8<br>(18.2 to 46.3)     | 0.7<br>(27.8 to 67.6)     | 1.4<br>(78.8 to 115.2)    | -0.2<br>(-3.4 to 67.2)    | 0.2                   |  |  |
| Georgia                                        | ☆☆☆☆                       | 110<br>(210 to 246)         | 12.3<br>(14.4 to 25.3) | 1.9<br>(1.4 to 6.1)    | 2.7<br>(1.4 to 6.1)    | 2.7<br>(-1.3 to 6.1)      | 0.2                         | 1160<br>(890 to 1550)        | 0.2<br>(33.5 to 67.7)     | 0.3<br>(52.3 to 96.9)     | 0.3<br>(20.7 to 146.8)    | -0.2<br>(-12.4 to 25.7)   | 0.1                   |  |  |
| Kazakhstan                                     | ☆☆☆☆                       | 440<br>(410 to 520)         | 4.2<br>(32.0 to 39.6)  | 0.8<br>(0.8 to 3.8)    | 0.8<br>(0.2 to 32.5)   | -0.4<br>(-2.0 to 1.2)     | 0.2                         | 2000<br>(1500 to 2800)       | 0.2<br>(44.0 to 262.6)    | 0.1<br>(28.9 to 61.3)     | 0.2<br>(8.8 to 142.7)     | -0.2<br>(-1.9 to 4.9)     | 0.2                   |  |  |
| Kyrgyzstan                                     | ☆☆☆☆                       | 67<br>(52 to 91.7)          | 0.7<br>(1.6 to 30.7)   | 0.1<br>(0.1 to 0.7)    | 0.2<br>(0.1 to 8.7)    | -0.2<br>(-1.8 to 1.3)     | 0.1                         | 211<br>(2400 to 4300)        | 0.1<br>(70.5 to 129.3)    | 0.1<br>(16.6 to 23.2)     | 0.1<br>(37.4 to 25.9)     | -0.6<br>(-7.4 to -2.9)    | 0.2                   |  |  |
| Mongolia                                       | ☆☆☆☆                       | 47<br>(47 to 73)            | 0.6<br>(0.6 to 43.4)   | 0.3<br>(0.3 to 4.4)    | 0.3<br>(0.1 to 24.4)   | -1.1<br>(-1.1 to 4.7)     | 0.2                         | 1990<br>(220 to 4000)        | 0.2<br>(20.2 to 219.3)    | 0.3<br>(23.8 to 99.6)     | 0.3<br>(74.3 to 128.5)    | -1.4<br>(-11.2 to 14.7)   | 0.2                   |  |  |
| Tajikistan                                     | ☆☆☆☆                       | 136<br>(131 to 65)          | 3.3<br>(6.1 to 10.9)   | 1.8<br>(1.8 to 6.8)    | 1.8<br>(4.9 to 2.1)    | -2.4<br>(-2.1 to 2.1)     | 0.3                         | 1990<br>(1500 to 2500)       | 0.2<br>(27.5 to 48.5)     | 0.3<br>(1.8 to 10.1)      | 0.3<br>(7.5 to 14.4)      | -2.3<br>(-4.1 to -21.9)   | 0.3                   |  |  |
| Turkmenistan                                   | ☆☆☆☆                       | 135<br>(105 to 166)         | 13.7<br>(18.1 to 21)   | 3.4<br>(1.8 to 10.1)   | 3.4<br>(2.7 to 10.2)   | -1.9<br>(-1.9 to 1.3)     | 0.2                         | 2450<br>(1700 to 2500)       | 66.5<br>(47.1 to 79.3)    | 40.6<br>(14.2 to 199.6)   | 40.6<br>(14.2 to 199.6)   | -11.2<br>(-15.4 to -10.8) | 0.3                   |  |  |
| Uzbekistan                                     | ☆☆☆☆                       | 120<br>(240 to 300)         | 11<br>(11.0 to 21.5)   | 4.9<br>(4.0 to 6.9)    | 4.9<br>(4.4 to 26)     | -1.7<br>(-2.4 to 2.6)     | 0.2                         | 1700<br>(12200 to 3000)      | 0.1<br>(43.7 to 101.1)    | 0.1<br>(20.5 to 30.9)     | 0.1<br>(37.5 to 52.4)     | 0.4<br>(5.6 to 16.4)      | 0.3                   |  |  |
| Central Europe                                 | ☆☆☆☆                       | 1000<br>(1900 to 2100)      | 11<br>(17.0 to 25.9)   | 7.9<br>(3.0 to 4.5)    | 8.4<br>(8.0 to 14.5)   | -2.3<br>(-2.7 to -14.5)   | 0.2                         | 6700<br>(5000 to 7400)       | 0.2<br>(63.8 to 94.6)     | 0.2<br>(145.1 to 164)     | 0.2<br>(42.6 to 57.9)     | -2.6<br>(-3.5 to -2.9)    | 0.2                   |  |  |
| Bulgaria                                       | ☆☆☆☆                       | 181<br>(137 to 220)         | 0.1<br>(5.2 to 10.2)   | 7.9<br>(2.8 to 4.5)    | 7.9<br>(4.2 to 6.9)    | -0.4<br>(-3.4 to 8.2)     | 0.4                         | 790<br>(570 to 170)          | 0.2<br>(22.5 to 40.1)     | 0.1<br>(13.1 to 21.1)     | 0.1<br>(18.6 to 31.7)     | -0.5<br>(-4.3 to 3.4)     | 0.5                   |  |  |
| Bosnia and Herzegovina                         | ☆☆☆☆                       | 273<br>(273 to 49)          | 0.9<br>(9.1 to 49)     | 0.1<br>(0.1 to 0.9)    | 0.1<br>(0.1 to 0.9)    | -0.4<br>(-5.7 to 0.9)     | 0.2                         | 1200<br>(970 to 1400)        | 0.1<br>(57.9 to 63.9)     | 0.1<br>(8.1 to 13.2)      | 0.1<br>(22.9 to 37.5)     | -0.2<br>(-3.6 to -4.8)    | 0.2                   |  |  |
| Croatia                                        | ☆☆☆☆                       | 100<br>(84 to 140)          | 0.8<br>(13.4 to 17)    | 0.4<br>(1.4 to 1.2)    | 0.4<br>(0.2 to 15.2)   | -0.4<br>(-1.4 to 1.2)     | 0.2                         | 1200<br>(1200 to 9000)       | 0.2<br>(46.2 to           |                           |                           |                           |                       |  |  |







|                       |      |                         |                        |                      |                        |                          |     |                           |                           |                           |                           |                          |     |
|-----------------------|------|-------------------------|------------------------|----------------------|------------------------|--------------------------|-----|---------------------------|---------------------------|---------------------------|---------------------------|--------------------------|-----|
| Ghana                 | ☆☆☆☆ | 137<br>(99.5 to 202)    | 16.3<br>(11.2 to 26.2) | 9.1<br>(6.2 to 12.6) | 12.2<br>(9.1 to 18.2)  | 16.4<br>(8.8 to 51.9)    | 0.6 | 2720<br>(410 to 8770)     | 358.8<br>(36.2 to 908.9)  | 266.4<br>(181.2 to 374.4) | 418.4<br>(286.4 to 604)   | 12.7<br>(-11.5 to 13.5)  | 0.5 |
| Liberia               | ☆☆☆☆ | 381<br>(105 to 655)     | 15.8<br>(11.6 to 19.4) | 17<br>(12.5 to 21.5) | 16.5<br>(11.3 to 19.6) | 45.9<br>(17 to 76.4)     | 1.1 | 14400<br>(1150 to 17300)  | 497.2<br>(82.4 to 621.2)  | 46.9<br>(33.4 to 56.9)    | 475.4<br>(178.9 to 587.7) | 39.7<br>(11.3 to 39)     | 0.9 |
| Mali                  | ☆☆☆☆ | 811<br>(331 to 934)     | 8.6<br>(5.1 to 17)     | 3.5<br>(2.2 to 5.2)  | 6<br>(3.9 to 10.1)     | -5.6<br>(-29.5 to 37.8)  | 0.4 | 2390<br>(1440 to 3770)    | 269.5<br>(124.8 to 377.1) | 186.5<br>(66.5 to 155.4)  | 186.5<br>(128.2 to 230.7) | -13.4<br>(-34 to -9.7)   | 0.4 |
| Mauritania            | ☆☆☆☆ | 133<br>(73.7 to 265)    | 6.3<br>(4.2 to 18.4)   | 3.1<br>(1.8 to 5.1)  | 5.6<br>(1.8 to 10.6)   | -1.9<br>(-4.3 to 26.9)   | 0.4 | 540<br>(202 to 1130)      | 25<br>(11.2 to 59.8)      | 66.4<br>(6.3 to 154.8)    | 66.4<br>(95.6 to 350.4)   | -2.4<br>(-47.8 to -16.3) | 0.4 |
| Niger                 | ☆☆☆☆ | 792<br>(496 to 1280)    | 10.2<br>(6.3 to 19)    | 5.8<br>(3.3 to 8.8)  | 79<br>(5.2 to 12.9)    | 16.4<br>(-12.5 to 50.7)  | 0.6 | 3070<br>(200 to 5070)     | 389<br>(198.2 to 616.4)   | 162.9<br>(91.2 to 243.8)  | 245.7<br>(161.2 to 404.8) | 97<br>(-16.6 to 106)     | 0.5 |
| Nigeria               | ☆☆☆☆ | 6900<br>(3830 to 10300) | 7.4<br>(3.8 to 14.6)   | 6.5<br>(3.2 to 11)   | 5<br>(4.4 to 11.5)     | -15.9<br>(-38.3 to 11.5) | 0.9 | 24400<br>(15300 to 42000) | 212.7<br>(111.6 to 499.9) | 162.5<br>(79.3 to 275.5)  | 196.5<br>(124.2 to 314.9) | 47<br>(-39.4 to -15.2)   | 0.7 |
| Sao Tome and Principe | ☆☆☆☆ | 376<br>(2.5 to 5.16)    | 1.8<br>(2.8 to 3)      | 1.8<br>(1.3 to 2.4)  | 3<br>(2.2 to 4)        | 12.8<br>(-15.5 to 22.3)  | 0.4 | 176<br>(11 to 247)        | 163.1<br>(90.6 to 285.9)  | 111.9<br>(39.9 to 166)    | 111.9<br>(76.2 to 151.5)  | 9.3<br>(-23.5 to 9.5)    | 0.4 |
| Senegal               | ☆☆☆☆ | 1040<br>(821 to 1280)   | 21.8<br>(17.3 to 26.6) | 11.6<br>(5.7 to 8.8) | 11.6<br>(11.4 to 16)   | 17.9<br>(-2.1 to 44)     | 0.3 | 4750<br>(1400 to 8200)    | 647.1<br>(511.4 to 832.1) | 303.5<br>(183.4 to 253.1) | 409<br>(343.4 to 501)     | 12.4<br>(-6 to 15.9)     | 0.3 |
| Sierra Leone          | ☆☆☆☆ | 134<br>(240 to 473)     | 11.4<br>(7.4 to 18.3)  | 8.2<br>(5.3 to 11.4) | 9.8<br>(2.2 to 13.7)   | 39.6<br>(18.5 to 71)     | 0.7 | 1480<br>(1040 to 2020)    | 377.7<br>(23.7 to 644.1)  | 214.7<br>(166 to 324)     | 305.1<br>(225.2 to 431.3) | 33.6<br>(6.3 to 35.6)    | 0.6 |
| Togo                  | ☆☆☆☆ | 645<br>(502 to 797)     | 23.1<br>(16.8 to 29.2) | 7.7<br>(6.6 to 11)   | 15.5<br>(12.3 to 18.9) | 29.4<br>(14 to 64.3)     | 0.4 | 2800<br>(2150 to 3500)    | 792.7<br>(51.4 to 1012)   | 247.3<br>(189.5 to 314.7) | 311<br>(398.3 to 629.8)   | 11.4<br>(0 to 30.9)      | 0.3 |

SR Table 2. Number of location years of data by source type for fatal self-harm (suicide) data

| Location                          | Data Source Type   |       |
|-----------------------------------|--------------------|-------|
|                                   | Vital registration | Other |
| China                             | 106562             | 0     |
| North Korea                       | 0                  | 0     |
| Taiwan                            | 1472               | 0     |
| Cambodia                          | 0                  | 79    |
| Indonesia                         | 0                  | 1752  |
| Laos                              | 0                  | 0     |
| Malaysia                          | 1106               | 0     |
| Maldives                          | 169                | 0     |
| Mauritius                         | 3320               | 0     |
| Myanmar                           | 0                  | 17    |
| Philippines                       | 2440               | 0     |
| Sri Lanka                         | 1000               | 0     |
| Seychelles                        | 749                | 0     |
| Thailand                          | 600                | 120   |
| Timor-Leste                       | 0                  | 0     |
| Vietnam                           | 0                  | 128   |
| American Samoa                    | 1686               | 0     |
| Federated States of<br>Micronesia | 0                  | 0     |
| Fiji                              | 1240               | 0     |
| Guam                              | 2253               | 0     |
| Kiribati                          | 682                | 0     |
| Marshall Islands                  | 0                  | 0     |
| Northern Mariana Islands          | 1575               | 0     |
| Papua New Guinea                  | 0                  | 0     |
| Samoa                             | 0                  | 0     |
| Solomon Islands                   | 0                  | 0     |
| Tonga                             | 40                 | 0     |
| Vanuatu                           | 0                  | 0     |
| Armenia                           | 1480               | 0     |
| Azerbaijan                        | 1000               | 0     |
| Georgia                           | 1880               | 0     |
| Kazakhstan                        | 1520               | 0     |
| Kyrgyzstan                        | 2582               | 0     |
| Mongolia                          | 4                  | 0     |
| Tajikistan                        | 920                | 0     |
| Turkmenistan                      | 1240               | 0     |
| Uzbekistan                        | 1800               | 0     |
| Albania                           | 2139               | 0     |
| Bosnia and Herzegovina            | 476                | 0     |
| Bulgaria                          | 3280               | 0     |
| Croatia                           | 3600               | 0     |
| Czech Republic                    | 3588               | 0     |

|                |        |   |
|----------------|--------|---|
| Hungary        | 4317   | 0 |
| Macedonia      | 2600   | 0 |
| Montenegro     | 840    | 0 |
| Poland         | 2495   | 0 |
| Romania        | 2800   | 0 |
| Serbia         | 2160   | 0 |
| Slovakia       | 2640   | 0 |
| Slovenia       | 3408   | 0 |
| Belarus        | 1080   | 0 |
| Estonia        | 2960   | 0 |
| Latvia         | 2920   | 0 |
| Lithuania      | 3080   | 0 |
| Moldova        | 2920   | 0 |
| Russia         | 0      | 0 |
| Ukraine        | 1240   | 0 |
| Brunei         | 1079   | 0 |
| Japan          | 191535 | 0 |
| South Korea    | 2680   | 0 |
| Singapore      | 2786   | 0 |
| Australia      | 4200   | 0 |
| New Zealand    | 4200   | 0 |
| Andorra        | 0      | 0 |
| Austria        | 4120   | 0 |
| Belgium        | 3800   | 0 |
| Cyprus         | 1317   | 0 |
| Denmark        | 3080   | 0 |
| Finland        | 2920   | 0 |
| France         | 4080   | 0 |
| Germany        | 3000   | 0 |
| Greece         | 3160   | 0 |
| Iceland        | 3652   | 0 |
| Ireland        | 4000   | 0 |
| Israel         | 2976   | 0 |
| Italy          | 3720   | 0 |
| Luxembourg     | 4039   | 0 |
| Malta          | 4170   | 0 |
| Netherlands    | 4320   | 0 |
| Norway         | 3720   | 0 |
| Portugal       | 3960   | 0 |
| Spain          | 4200   | 0 |
| Sweden         | 8637   | 0 |
| Switzerland    | 2880   | 0 |
| United Kingdom | 625110 | 0 |
| Argentina      | 2840   | 0 |
| Chile          | 2800   | 0 |
| Uruguay        | 2760   | 0 |
| Canada         | 3480   | 0 |

|                                     |        |    |
|-------------------------------------|--------|----|
| Greenland                           | 2244   | 0  |
| United States                       | 217004 | 0  |
| Antigua and Barbuda                 | 1991   | 0  |
| The Bahamas                         | 2237   | 0  |
| Barbados                            | 2305   | 0  |
| Belize                              | 2720   | 0  |
| Bermuda                             | 2630   | 0  |
| Cuba                                | 2772   | 0  |
| Dominica                            | 2591   | 0  |
| Dominican Republic                  | 2600   | 0  |
| Grenada                             | 2222   | 0  |
| Guyana                              | 2372   | 0  |
| Haiti                               | 0      | 0  |
| Jamaica                             | 1667   | 0  |
| Puerto Rico                         | 0      | 0  |
| Saint Lucia                         | 2679   | 0  |
| Saint Vincent and the<br>Grenadines | 2462   | 0  |
| Suriname                            | 2760   | 0  |
| Trinidad and Tobago                 | 2200   | 0  |
| Virgin Islands, U.S.                | 2263   | 0  |
| Bolivia                             | 0      | 0  |
| Ecuador                             | 2920   | 0  |
| Peru                                | 1640   | 0  |
| Colombia                            | 4080   | 0  |
| Costa Rica                          | 2840   | 0  |
| El Salvador                         | 2440   | 0  |
| Guatemala                           | 2480   | 0  |
| Honduras                            | 120    | 0  |
| Mexico                              | 138120 | 0  |
| Nicaragua                           | 2360   | 0  |
| Panama                              | 2520   | 0  |
| Venezuela                           | 2680   | 0  |
| Brazil                              | 100515 | 0  |
| Paraguay                            | 2840   | 0  |
| Afghanistan                         | 0      | 40 |
| Algeria                             | 0      | 0  |
| Bahrain                             | 1960   | 0  |
| Egypt                               | 8      | 0  |
| Iran                                | 800    | 0  |
| Iraq                                | 120    | 0  |
| Jordan                              | 960    | 0  |
| Kuwait                              | 2800   | 0  |
| Lebanon                             | 0      | 0  |
| Libya                               | 0      | 0  |
| Morocco                             | 0      | 0  |
| Palestine                           | 1360   | 0  |

|                                  |       |      |
|----------------------------------|-------|------|
| Oman                             | 40    | 0    |
| Qatar                            | 1560  | 0    |
| Saudi Arabia                     | 8536  | 0    |
| Sudan                            | 0     | 0    |
| Syria                            | 560   | 0    |
| Tunisia                          | 0     | 0    |
| Turkey                           | 600   | 47   |
| United Arab Emirates             | 0     | 61   |
| Yemen                            | 0     | 0    |
| Bangladesh                       | 0     | 1793 |
| Bhutan                           | 0     | 40   |
| India                            | 81    | 912  |
| Nepal                            | 0     | 0    |
| Pakistan                         | 0     | 35   |
| Angola                           | 0     | 40   |
| Central African Republic         | 0     | 0    |
| Congo                            | 0     | 0    |
| Democratic Republic of the Congo | 0     | 0    |
| Equatorial Guinea                | 0     | 0    |
| Gabon                            | 0     | 0    |
| Burundi                          | 0     | 0    |
| Comoros                          | 0     | 0    |
| Djibouti                         | 0     | 0    |
| Eritrea                          | 0     | 0    |
| Ethiopia                         | 0     | 177  |
| Kenya                            | 0     | 1000 |
| Madagascar                       | 0     | 0    |
| Malawi                           | 0     | 376  |
| Mozambique                       | 0     | 120  |
| Rwanda                           | 0     | 0    |
| Somalia                          | 0     | 0    |
| South Sudan                      | 0     | 0    |
| Tanzania                         | 0     | 120  |
| Uganda                           | 0     | 0    |
| Zambia                           | 80    | 0    |
| Botswana                         | 0     | 0    |
| Lesotho                          | 0     | 0    |
| Namibia                          | 0     | 0    |
| South Africa                     | 18760 | 1300 |
| Swaziland                        | 0     | 0    |
| Zimbabwe                         | 110   | 0    |
| Benin                            | 0     | 0    |
| Burkina Faso                     | 0     | 167  |
| Cameroon                         | 0     | 0    |
| Cape Verde                       | 244   | 0    |
| Chad                             | 0     | 0    |

|                       |     |     |
|-----------------------|-----|-----|
| Cote d'Ivoire         | 0   | 20  |
| The Gambia            | 0   | 20  |
| Ghana                 | 202 | 328 |
| Guinea                | 0   | 0   |
| Guinea-Bissau         | 0   | 0   |
| Liberia               | 0   | 0   |
| Mali                  | 0   | 0   |
| Mauritania            | 0   | 0   |
| Niger                 | 0   | 0   |
| Nigeria               | 0   | 0   |
| Sao Tome and Principe | 40  | 0   |
| Senegal               | 0   | 40  |
| Sierra Leone          | 0   | 0   |
| Togo                  | 0   | 0   |



**SR Table 3. CODEm covariates used in suicide death estimation and expected direction of covariate by sex, and age**

| Cause                                | Sex    | Age start   | Age end   | Direction | Covariate                                           |
|--------------------------------------|--------|-------------|-----------|-----------|-----------------------------------------------------|
| Self-harm and interpersonal violence | Female | 0-6 days    | 95+ years | 1         | Alcohol (liters per capita)                         |
| Self-harm and interpersonal violence | Female | 0-6 days    | 95+ years | -1        | Education (years per capita)                        |
| Self-harm and interpersonal violence | Female | 0-6 days    | 95+ years | 0         | LDI (I\$ per capita)                                |
| Self-harm and interpersonal violence | Female | 0-6 days    | 95+ years | 0         | Elevation Over 1500m (proportion)                   |
| Self-harm and interpersonal violence | Female | 0-6 days    | 95+ years | 0         | Population Density (over 1000 ppl/sqkm, proportion) |
| Self-harm and interpersonal violence | Female | 0-6 days    | 95+ years | 0         | Population Density (under 150 ppl/sqkm, proportion) |
| Self-harm and interpersonal violence | Female | 0-6 days    | 95+ years | 0         | Elevation Under 100m (proportion)                   |
| Self-harm and interpersonal violence | Female | 0-6 days    | 95+ years | 1         | Log-transformed SEV scalar: Oth Unint               |
| Self-harm and interpersonal violence | Female | 0-6 days    | 95+ years | 1         | Healthcare access and quality index                 |
| Self-harm and interpersonal violence | Male   | 0-6 days    | 95+ years | 1         | Alcohol (liters per capita)                         |
| Self-harm and interpersonal violence | Male   | 0-6 days    | 95+ years | -1        | Education (years per capita)                        |
| Self-harm and interpersonal violence | Male   | 0-6 days    | 95+ years | 0         | LDI (I\$ per capita)                                |
| Self-harm and interpersonal violence | Male   | 0-6 days    | 95+ years | 0         | Elevation Over 1500m (proportion)                   |
| Self-harm and interpersonal violence | Male   | 0-6 days    | 95+ years | 0         | Population Density (over 1000 ppl/sqkm, proportion) |
| Self-harm and interpersonal violence | Male   | 0-6 days    | 95+ years | 0         | Population Density (under 150 ppl/sqkm, proportion) |
| Self-harm and interpersonal violence | Male   | 0-6 days    | 95+ years | 0         | Elevation Under 100m (proportion)                   |
| Self-harm and interpersonal violence | Male   | 0-6 days    | 95+ years | 1         | Log-transformed SEV scalar: Oth Unint               |
| Self-harm and interpersonal violence | Male   | 0-6 days    | 95+ years | 1         | Healthcare access and quality index                 |
| Self-harm                            | Female | 10-14 years | 95+ years | 1         | Alcohol (liters per capita)                         |
| Self-harm                            | Female | 10-14 years | 95+ years | 0         | Education (years per capita)                        |
| Self-harm                            | Female | 10-14 years | 95+ years | 0         | LDI (I\$ per capita)                                |
| Self-harm                            | Female | 10-14 years | 95+ years | 0         | Population Density (150-300 ppl/sqkm, proportion)   |
| Self-harm                            | Female | 10-14 years | 95+ years | 0         | Population Density (300-500 ppl/sqkm, proportion)   |
| Self-harm                            | Female | 10-14 years | 95+ years | 0         | Population Density (500-1000 ppl/sqkm, proportion)  |
| Self-harm                            | Female | 10-14 years | 95+ years | 0         | Population Density (over 1000 ppl/sqkm, proportion) |
| Self-harm                            | Female | 10-14 years | 95+ years | 0         | Population Density (under 150 ppl/sqkm, proportion) |

|                      |        |             |           |    |                                                     |
|----------------------|--------|-------------|-----------|----|-----------------------------------------------------|
| Self-harm            | Female | 10-14 years | 95+ years | -1 | Religion (binary, >50% Muslim)                      |
| Self-harm            | Female | 10-14 years | 95+ years | 1  | Log-transformed SEV scalar: Self Harm               |
| Self-harm            | Female | 10-14 years | 95+ years | 0  | Socio-demographic Index                             |
| Self-harm            | Female | 10-14 years | 95+ years | 1  | Major depressive disorder                           |
| Self-harm            | Female | 10-14 years | 95+ years | -1 | Healthcare access and quality index                 |
| Self-harm            | Male   | 10-14 years | 95+ years | 1  | Alcohol (liters per capita)                         |
| Self-harm            | Male   | 10-14 years | 95+ years | 0  | Education (years per capita)                        |
| Self-harm            | Male   | 10-14 years | 95+ years | 0  | LDI (I\$ per capita)                                |
| Self-harm            | Male   | 10-14 years | 95+ years | 0  | Population Density (150-300 ppl/sqkm, proportion)   |
| Self-harm            | Male   | 10-14 years | 95+ years | 0  | Population Density (300-500 ppl/sqkm, proportion)   |
| Self-harm            | Male   | 10-14 years | 95+ years | 0  | Population Density (500-1000 ppl/sqkm, proportion)  |
| Self-harm            | Male   | 10-14 years | 95+ years | 0  | Population Density (over 1000 ppl/sqkm, proportion) |
| Self-harm            | Male   | 10-14 years | 95+ years | 0  | Population Density (under 150 ppl/sqkm, proportion) |
| Self-harm            | Male   | 10-14 years | 95+ years | -1 | Religion (binary, >50% Muslim)                      |
| Self-harm            | Male   | 10-14 years | 95+ years | 0  | Socio-demographic Index                             |
| Self-harm            | Male   | 10-14 years | 95+ years | -1 | Healthcare access and quality index                 |
| Self-harm by firearm | Female | 10-14 years | 95+ years | 1  | Alcohol (liters per capita)                         |
| Self-harm by firearm | Female | 10-14 years | 95+ years | 0  | Education (years per capita)                        |
| Self-harm by firearm | Female | 10-14 years | 95+ years | 0  | LDI (I\$ per capita)                                |
| Self-harm by firearm | Female | 10-14 years | 95+ years | 0  | Population Density (150-300 ppl/sqkm, proportion)   |
| Self-harm by firearm | Female | 10-14 years | 95+ years | 0  | Population Density (300-500 ppl/sqkm, proportion)   |
| Self-harm by firearm | Female | 10-14 years | 95+ years | 0  | Population Density (500-1000 ppl/sqkm, proportion)  |
| Self-harm by firearm | Female | 10-14 years | 95+ years | 0  | Population Density (over 1000 ppl/sqkm, proportion) |
| Self-harm by firearm | Female | 10-14 years | 95+ years | 0  | Population Density (under 150 ppl/sqkm, proportion) |
| Self-harm by firearm | Female | 10-14 years | 95+ years | -1 | Religion (binary, >50% Muslim)                      |
| Self-harm by firearm | Female | 10-14 years | 95+ years | 1  | Log-transformed SEV scalar: Self Harm               |
| Self-harm by firearm | Female | 10-14 years | 95+ years | 0  | Socio-demographic Index                             |
| Self-harm by firearm | Female | 10-14 years | 95+ years | 1  | Major depressive disorder                           |
| Self-harm by firearm | Female | 10-14 years | 95+ years | -1 | Healthcare access and quality index                 |

|                                    |        |             |           |    |                                                     |
|------------------------------------|--------|-------------|-----------|----|-----------------------------------------------------|
| Self-harm by firearm               | Male   | 10-14 years | 95+ years | 1  | Alcohol (liters per capita)                         |
| Self-harm by firearm               | Male   | 10-14 years | 95+ years | 0  | Education (years per capita)                        |
| Self-harm by firearm               | Male   | 10-14 years | 95+ years | 0  | LDI (I\$ per capita)                                |
| Self-harm by firearm               | Male   | 10-14 years | 95+ years | 0  | Population Density (150-300 ppl/sqkm, proportion)   |
| Self-harm by firearm               | Male   | 10-14 years | 95+ years | 0  | Population Density (300-500 ppl/sqkm, proportion)   |
| Self-harm by firearm               | Male   | 10-14 years | 95+ years | 0  | Population Density (500-1000 ppl/sqkm, proportion)  |
| Self-harm by firearm               | Male   | 10-14 years | 95+ years | 0  | Population Density (over 1000 ppl/sqkm, proportion) |
| Self-harm by firearm               | Male   | 10-14 years | 95+ years | 0  | Population Density (under 150 ppl/sqkm, proportion) |
| Self-harm by firearm               | Male   | 10-14 years | 95+ years | -1 | Religion (binary, >50% Muslim)                      |
| Self-harm by firearm               | Male   | 10-14 years | 95+ years | 1  | Log-transformed SEV scalar: Self Harm               |
| Self-harm by firearm               | Male   | 10-14 years | 95+ years | 0  | Socio-demographic Index                             |
| Self-harm by firearm               | Male   | 10-14 years | 95+ years | 1  | Major depressive disorder                           |
| Self-harm by firearm               | Male   | 10-14 years | 95+ years | -1 | Healthcare access and quality index                 |
| Self-harm by other specified means | Female | 10-14 years | 95+ years | 1  | Alcohol (liters per capita)                         |
| Self-harm by other specified means | Female | 10-14 years | 95+ years | 0  | Education (years per capita)                        |
| Self-harm by other specified means | Female | 10-14 years | 95+ years | 0  | LDI (I\$ per capita)                                |
| Self-harm by other specified means | Female | 10-14 years | 95+ years | 0  | Population Density (150-300 ppl/sqkm, proportion)   |
| Self-harm by other specified means | Female | 10-14 years | 95+ years | 0  | Population Density (300-500 ppl/sqkm, proportion)   |
| Self-harm by other specified means | Female | 10-14 years | 95+ years | 0  | Population Density (500-1000 ppl/sqkm, proportion)  |
| Self-harm by other specified means | Female | 10-14 years | 95+ years | 0  | Population Density (over 1000 ppl/sqkm, proportion) |
| Self-harm by other specified means | Female | 10-14 years | 95+ years | 0  | Population Density (under 150 ppl/sqkm, proportion) |
| Self-harm by other specified means | Female | 10-14 years | 95+ years | -1 | Religion (binary, >50% Muslim)                      |
| Self-harm by other specified means | Female | 10-14 years | 95+ years | 1  | Log-transformed SEV scalar: Self Harm               |
| Self-harm by other specified means | Female | 10-14 years | 95+ years | 0  | Socio-demographic Index                             |
| Self-harm by other specified means | Female | 10-14 years | 95+ years | 1  | Major depressive disorder                           |
| Self-harm by other specified means | Female | 10-14 years | 95+ years | -1 | Healthcare access and quality index                 |
| Self-harm by other specified means | Male   | 10-14 years | 95+ years | 1  | Alcohol (liters per capita)                         |
| Self-harm by other specified means | Male   | 10-14 years | 95+ years | 0  | Education (years per capita)                        |
| Self-harm by other specified means | Male   | 10-14 years | 95+ years | 0  | LDI (I\$ per capita)                                |

|                                    |      |             |           |    |                                                     |
|------------------------------------|------|-------------|-----------|----|-----------------------------------------------------|
| Self-harm by other specified means | Male | 10-14 years | 95+ years | 0  | Population Density (150-300 ppl/sqkm, proportion)   |
| Self-harm by other specified means | Male | 10-14 years | 95+ years | 0  | Population Density (300-500 ppl/sqkm, proportion)   |
| Self-harm by other specified means | Male | 10-14 years | 95+ years | 0  | Population Density (500-1000 ppl/sqkm, proportion)  |
| Self-harm by other specified means | Male | 10-14 years | 95+ years | 0  | Population Density (over 1000 ppl/sqkm, proportion) |
| Self-harm by other specified means | Male | 10-14 years | 95+ years | 0  | Population Density (under 150 ppl/sqkm, proportion) |
| Self-harm by other specified means | Male | 10-14 years | 95+ years | -1 | Religion (binary, >50% Muslim)                      |
| Self-harm by other specified means | Male | 10-14 years | 95+ years | 1  | Log-transformed SEV scalar: Self Harm               |
| Self-harm by other specified means | Male | 10-14 years | 95+ years | 0  | Socio-demographic Index                             |
| Self-harm by other specified means | Male | 10-14 years | 95+ years | 1  | Major depressive disorder                           |
| Self-harm by other specified means | Male | 10-14 years | 95+ years | -1 | Healthcare access and quality index                 |

**SR Table 4. Total number of deaths, mortality rate per 100,000, total years of life lost (YLL) and YLL rate per 100,000 by sex and 5-year age group globally in 2016. Values in brackets are 95% uncertainty intervals.**

| Age (years) | Deaths                    |                           |                        |                        | YLLs                            |                                 |                           |                             |
|-------------|---------------------------|---------------------------|------------------------|------------------------|---------------------------------|---------------------------------|---------------------------|-----------------------------|
|             | Number                    |                           | Rate                   |                        | Number                          |                                 | Rate                      |                             |
|             | Female                    | Male                      | Female                 | Male                   | Female                          | Male                            | Female                    | Male                        |
| 10 to 14    | 3443<br>(2935 to 3973)    | 4533<br>(3759 to 5226)    | 1.2<br>(1 to 1.3)      | 1.4<br>(1.2 to 1.7)    | 255420<br>(217752 to 294737)    | 335984<br>(278636 to 387405)    | 86.6<br>(73.8 to 99.9)    | 106.3<br>(88.2 to 122.6)    |
| 15 to 19    | 24269<br>(21474 to 27295) | 25002<br>(22016 to 28007) | 8.5<br>(7.5 to 9.6)    | 8.2<br>(7.2 to 9.2)    | 1680169<br>(1486670 to 1889675) | 1729132<br>(1522633 to 1937196) | 588.3<br>(520.5 to 661.7) | 566.9<br>(499.2 to 635.1)   |
| 20 to 24    | 29624<br>(26668 to 32689) | 50088<br>(44511 to 55363) | 10.2<br>(9.2 to 11.2)  | 16.2<br>(14.4 to 17.9) | 1907169<br>(1716876 to 2104513) | 3221939<br>(2863325 to 3561319) | 654.6<br>(589.3 to 722.3) | 1041.6<br>(925.6 to 1151.3) |
| 25 to 29    | 27970<br>(25456 to 30465) | 57703<br>(51608 to 64771) | 9.3<br>(8.5 to 10.2)   | 18.4<br>(16.4 to 20.6) | 1662786<br>(1513252 to 1811177) | 3428497<br>(3066460 to 3848383) | 554.7<br>(504.8 to 604.2) | 1092.5<br>(977.1 to 1226.3) |
| 30 to 34    | 20843<br>(19138 to 22628) | 54874<br>(47900 to 60578) | 7.5<br>(6.9 to 8.2)    | 19.2<br>(16.8 to 21.2) | 1135371<br>(1042462 to 1232644) | 2988885<br>(2609217 to 3299609) | 410.2<br>(376.6 to 445.3) | 1047.2<br>(914.2 to 1156.1) |
| 35 to 39    | 18293<br>(16984 to 19812) | 49900<br>(42609 to 55900) | 7.3<br>(6.8 to 8)      | 19.6<br>(16.7 to 21.9) | 906004<br>(841153 to 981292)    | 2472196<br>(2110838 to 2769678) | 363.8<br>(337.8 to 394)   | 970.2<br>(828.4 to 1086.9)  |
| 40 to 44    | 16722<br>(15727 to 17959) | 47374<br>(41752 to 53739) | 6.9<br>(6.5 to 7.5)    | 19.2<br>(17 to 21.8)   | 746156<br>(701748 to 801313)    | 2115160<br>(1864119 to 2399125) | 310<br>(291.5 to 332.9)   | 859.1<br>(757.2 to 974.5)   |
| 45 to 49    | 17118<br>(16154 to 18148) | 46515<br>(40804 to 52243) | 7.5<br>(7 to 7.9)      | 20.1<br>(17.6 to 22.5) | 681316<br>(642967 to 722299)    | 1852518<br>(1625060 to 2080605) | 297.1<br>(280.4 to 315)   | 798.6<br>(700.6 to 897)     |
| 50 to 54    | 17409<br>(16538 to 18574) | 44884<br>(39328 to 51620) | 8.5<br>(8 to 9)        | 21.9<br>(19.2 to 25.2) | 610887<br>(580310 to 651742)    | 1575656<br>(1380558 to 1812076) | 296.7<br>(281.9 to 316.5) | 768<br>(672.9 to 883.2)     |
| 55 to 59    | 15165<br>(14212 to 16252) | 41246<br>(35534 to 47190) | 8.6<br>(8.1 to 9.3)    | 24.1<br>(20.8 to 27.6) | 461598<br>(432613 to 494703)    | 1256677<br>(1082671 to 1437837) | 263.1<br>(246.6 to 282)   | 734.7<br>(633 to 840.6)     |
| 60 to 64    | 15273<br>(14164 to 16410) | 35295<br>(30261 to 39672) | 9.9<br>(9.2 to 10.7)   | 24.1<br>(20.7 to 27.1) | 395425<br>(366725 to 424846)    | 915132<br>(784758 to 1028627)   | 256.8<br>(238.2 to 276)   | 625.4<br>(536.3 to 703)     |
| 65 to 69    | 13688<br>(12699 to 14778) | 29275<br>(24383 to 33101) | 11.6<br>(10.7 to 12.5) | 27.2<br>(22.6 to 30.7) | 293831<br>(272595 to 317253)    | 629630<br>(524501 to 711971)    | 248.7<br>(230.7 to 268.5) | 584.8<br>(487.2 to 661.3)   |
| 70 to 74    | 11066<br>(10234 to 12025) | 23192<br>(19363 to 26089) | 13.2<br>(12.2 to 14.3) | 31.7<br>(26.5 to 35.7) | 190582<br>(176232 to 207083)    | 400500<br>(334311 to 450465)    | 226.6<br>(209.6 to 246.2) | 547.4<br>(457 to 615.7)     |
| 75 to 79    | 10037<br>(9221 to 10952)  | 20561<br>(16831 to 22931) | 15.4<br>(14.2 to 16.8) | 40<br>(32.7 to 44.6)   | 133144<br>(122315 to 145263)    | 273970<br>(224236 to 305506)    | 204.3<br>(187.7 to 222.9) | 533<br>(436.2 to 594.3)     |
| 80 to 84    | 7857<br>(7268 to 8474)    | 15650<br>(12786 to 17448) | 18.6<br>(17.2 to 20.1) | 51.6<br>(42.1 to 57.5) | 76597<br>(70860 to 82607)       | 153499<br>(125320 to 171155)    | 181.4<br>(167.8 to 195.6) | 505.8<br>(412.9 to 563.9)   |
| 85 to 89    | 5638<br>(5279 to 6070)    | 9477<br>(7752 to 10475)   | 22.4<br>(21 to 24.2)   | 64.4<br>(52.7 to 71.2) | 38656<br>(36193 to 41621)       | 65477<br>(53547 to 72400)       | 153.9<br>(144.1 to 165.7) | 444.9<br>(363.9 to 492)     |
| 90 to 94    | 2483<br>(2324 to 2665)    | 3309<br>(2651 to 3613)    | 24.3<br>(22.8 to 26.1) | 72.6<br>(58.2 to 79.3) | 11625<br>(10877 to 12476)       | 15631<br>(12518 to 17072)       | 113.9<br>(106.6 to 122.2) | 342.9<br>(274.6 to 374.5)   |
| 95 plus     | 727<br>(677 to 779)       | 646<br>(532 to 711)       | 29.2<br>(27.2 to 31.3) | 80.1<br>(65.9 to 88.1) | 2193<br>(2043 to 2351)          | 2005<br>(1653 to 2204)          | 88.1<br>(82 to 94.4)      | 248.4<br>(204.7 to 273)     |

**SR Table 5.** List of 195 countries and territories and their corresponding 3 letter identifiers used in the GBD study

| Location Name            | ISO |
|--------------------------|-----|
| Afghanistan              | AFG |
| Albania                  | ALB |
| Algeria                  | DZA |
| American Samoa           | ASM |
| Andorra                  | AND |
| Angola                   | AGO |
| Antigua and Barbuda      | ATG |
| Argentina                | ARG |
| Armenia                  | ARM |
| Australia                | AUS |
| Austria                  | AUT |
| Azerbaijan               | AZE |
| Bahrain                  | BHR |
| Bangladesh               | BGD |
| Barbados                 | BRB |
| Belarus                  | BLR |
| Belgium                  | BEL |
| Belize                   | BLZ |
| Benin                    | BEN |
| Bermuda                  | BMU |
| Bhutan                   | BTN |
| Bolivia                  | BOL |
| Bosnia and Herzegovina   | BIH |
| Botswana                 | BWA |
| Brazil                   | BRA |
| Brunei                   | BRN |
| Bulgaria                 | BGR |
| Burkina Faso             | BFA |
| Burundi                  | BDI |
| Cambodia                 | KHM |
| Cameroon                 | CMR |
| Canada                   | CAN |
| Cape Verde               | CPV |
| Central African Republic | CAF |
| Chad                     | TCD |
| Chile                    | CHL |

**SR Table 5.** List of 195 countries and territories and their corresponding 3 letter identifiers used in the GBD study

|                                  |     |
|----------------------------------|-----|
| China                            | CHN |
| Colombia                         | COL |
| Comoros                          | COM |
| Congo                            | COG |
| Costa Rica                       | CRI |
| Cote d'Ivoire                    | CIV |
| Croatia                          | HRV |
| Cuba                             | CUB |
| Cyprus                           | CYP |
| Czech Republic                   | CZE |
| Democratic Republic of the Congo | COD |
| Denmark                          | DNK |
| Djibouti                         | DJI |
| Dominica                         | DMA |
| Dominican Republic               | DOM |
| Ecuador                          | ECU |
| Egypt                            | EGY |
| El Salvador                      | SLV |
| Equatorial Guinea                | GNQ |
| Eritrea                          | ERI |
| Estonia                          | EST |
| Ethiopia                         | ETH |
| Federated States of Micronesia   | FSM |
| Fiji                             | FJI |
| Finland                          | FIN |
| France                           | FRA |
| Gabon                            | GAB |
| Georgia                          | GEO |
| Germany                          | DEU |
| Ghana                            | GHA |
| Greece                           | GRC |
| Greenland                        | GRL |
| Grenada                          | GRD |
| Guam                             | GUM |
| Guatemala                        | GTM |
| Guinea                           | GIN |
| Guinea-Bissau                    | GNB |

**SR Table 5.** List of 195 countries and territories and their corresponding 3 letter identifiers used in the GBD study

|                  |     |
|------------------|-----|
| Guyana           | GUY |
| Haiti            | HTI |
| Honduras         | HND |
| Hungary          | HUN |
| Iceland          | ISL |
| India            | IND |
| Indonesia        | IDN |
| Iran             | IRN |
| Iraq             | IRQ |
| Ireland          | IRL |
| Israel           | ISR |
| Italy            | ITA |
| Jamaica          | JAM |
| Japan            | JPN |
| Jordan           | JOR |
| Kazakhstan       | KAZ |
| Kenya            | KEN |
| Kiribati         | KIR |
| Kuwait           | KWT |
| Kyrgyzstan       | KGZ |
| Laos             | LAO |
| Latvia           | LVA |
| Lebanon          | LBN |
| Lesotho          | LSO |
| Liberia          | LBR |
| Libya            | LBY |
| Lithuania        | LTU |
| Luxembourg       | LUX |
| Macedonia        | MKD |
| Madagascar       | MDG |
| Malawi           | MWI |
| Malaysia         | MYS |
| Maldives         | MDV |
| Mali             | MLI |
| Malta            | MLT |
| Marshall Islands | MHL |
| Mauritania       | MRT |



**SR Table 5.** List of 195 countries and territories and their corresponding 3 letter identifiers used in the GBD study

|                                  |     |
|----------------------------------|-----|
| Mauritius                        | MUS |
| Mexico                           | MEX |
| Moldova                          | MDA |
| Mongolia                         | MNG |
| Montenegro                       | MNE |
| Morocco                          | MAR |
| Mozambique                       | MOZ |
| Myanmar                          | MMR |
| Namibia                          | NAM |
| Nepal                            | NPL |
| Netherlands                      | NLD |
| New Zealand                      | NZL |
| Nicaragua                        | NIC |
| Niger                            | NER |
| Nigeria                          | NGA |
| North Korea                      | PRK |
| Northern Mariana Islands         | MNP |
| Norway                           | NOR |
| Oman                             | OMN |
| Pakistan                         | PAK |
| Palestine                        | PSE |
| Panama                           | PAN |
| Papua New Guinea                 | PNG |
| Paraguay                         | PRY |
| Peru                             | PER |
| Philippines                      | PHL |
| Poland                           | POL |
| Portugal                         | PRT |
| Puerto Rico                      | PRI |
| Qatar                            | QAT |
| Romania                          | ROU |
| Russia                           | RUS |
| Rwanda                           | RWA |
| Saint Lucia                      | LCA |
| Saint Vincent and the Grenadines | VCT |
| Samoa                            | WSM |
| Sao Tome and Principe            | STP |

**SR Table 5.** List of 195 countries and territories and their corresponding 3 letter identifiers used in the GBD study

|                      |     |
|----------------------|-----|
| Saudi Arabia         | SAU |
| Senegal              | SEN |
| Serbia               | SRB |
| Seychelles           | SYC |
| Sierra Leone         | SLE |
| Singapore            | SGP |
| Slovakia             | SVK |
| Slovenia             | SVN |
| Solomon Islands      | SLB |
| Somalia              | SOM |
| South Africa         | ZAF |
| South Korea          | KOR |
| South Sudan          | SSD |
| Spain                | ESP |
| Sri Lanka            | LKA |
| Sudan                | SDN |
| Suriname             | SUR |
| Swaziland            | SWZ |
| Sweden               | SWE |
| Switzerland          | CHE |
| Syria                | SYR |
| Taiwan               | TWN |
| Tajikistan           | TJK |
| Tanzania             | TZA |
| Thailand             | THA |
| The Bahamas          | BHS |
| The Gambia           | GMB |
| Timor-Leste          | TLS |
| Togo                 | TGO |
| Tonga                | TON |
| Trinidad and Tobago  | TTO |
| Tunisia              | TUN |
| Turkey               | TUR |
| Turkmenistan         | TKM |
| Uganda               | UGA |
| Ukraine              | UKR |
| United Arab Emirates | ARE |

**SR Table 5.** List of 195 countries and territories and their corresponding 3 letter identifiers used in the GBD study

|                      |     |
|----------------------|-----|
| United Kingdom       | GBR |
| United States        | USA |
| Uruguay              | URY |
| Uzbekistan           | UZB |
| Vanuatu              | VUT |
| Venezuela            | VEN |
| Vietnam              | VNM |
| Virgin Islands, U.S. | VIR |
| Yemen                | YEM |
| Zambia               | ZMB |
| Zimbabwe             | ZWE |

---
